# Supplementary material for: Urinary albumin excretion as a marker of endothelial dysfunction in migraine sufferers: the HUNT study, Norway
Source: PubMed Central journal article supplement — BMJ Open. 2013 Aug 9;3(8):e003268. doi: 10.1136/bmjopen-2013-003268 (PMC3740253; doi:10.1136/bmjopen-2013-003268), 2013-08-09
Supplement: bmjopen-2013-003268.draft_revisions.pdf [file bmjopen-2013-003268.draft_revisions.pdf]

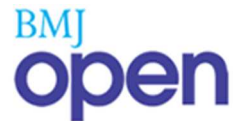

**Urinary albumin excretion as a marker of endothelial dysfunction in migraineurs; the HUNT study, Norway**

|                                 |                                                                                                                                                                                                                                                                                                                                                                                                                                                                                                                                                                               |
|---------------------------------|-------------------------------------------------------------------------------------------------------------------------------------------------------------------------------------------------------------------------------------------------------------------------------------------------------------------------------------------------------------------------------------------------------------------------------------------------------------------------------------------------------------------------------------------------------------------------------|
| Journal:                        | <i>BMJ Open</i>                                                                                                                                                                                                                                                                                                                                                                                                                                                                                                                                                               |
| Manuscript ID:                  | bmjopen-2013-003268                                                                                                                                                                                                                                                                                                                                                                                                                                                                                                                                                           |
| Article Type:                   | Research                                                                                                                                                                                                                                                                                                                                                                                                                                                                                                                                                                      |
| Date Submitted by the Author:   | 21-May-2013                                                                                                                                                                                                                                                                                                                                                                                                                                                                                                                                                                   |
| Complete List of Authors:       | Jacobsen, Line; Oslo University Hospital, FORMI<br>Winsvold, Bendik; Oslo University Hospital, FORMI<br>Romunstad, Solfrid; Norwegian University of Science and Technology, Department of Cancer Research and Molecular Medicine<br>Pripp, Are; Oslo University Hospital, Department of Biostatistics, Epidemiology & Health Economy<br>Holmen, Jostein; HUNT Research Centre, Norwegian University of Science and Technology, Department of Public Health and General Practic<br>Zwart, John-Anker; Oslo University Hospital, FORMI; University of Oslo, Faculty of Medicine |
| <b>Primary Subject Heading</b>: | Neurology                                                                                                                                                                                                                                                                                                                                                                                                                                                                                                                                                                     |
| Secondary Subject Heading:      | Epidemiology                                                                                                                                                                                                                                                                                                                                                                                                                                                                                                                                                                  |
| Keywords:                       | Migraine < NEUROLOGY, Neurobiology < BASIC SCIENCES, VASCULAR MEDICINE                                                                                                                                                                                                                                                                                                                                                                                                                                                                                                        |
|                                 |                                                                                                                                                                                                                                                                                                                                                                                                                                                                                                                                                                               |

SCHOLARONE™  
Manuscripts

only

**Title page****Title**

Urinary albumin excretion as a marker of endothelial dysfunction in migraineurs; the HUNT study, Norway

**Authors**

Line Melå Jacobsen<sup>a</sup>, Bendik S Winsvold<sup>ab</sup>, Solfrid Romundstad<sup>cd</sup>, Are Hugo Pripp<sup>e</sup>, Jostein Holmen<sup>f</sup>, John-Anker Zwart<sup>abg</sup>

**Affiliations**

a: FORMI, Oslo University Hospital, Oslo, Norway

b: Department of Neurology, Oslo University Hospital, Oslo, Norway

c: Department of Cancer Research and Molecular Medicine, Norwegian University of Science and Technology, Trondheim, Norway

d: Department of Internal Medicine, Levanger Hospital, Health Trust Nord-Trøndelag, Levanger, Norway

e: Department of Biostatistics, Epidemiology & Health Economy, Oslo University Hospital, Oslo, Norway

f: HUNT Research Centre, Department of Public Health and General Practice, Norwegian University of Science and Technology, Levanger, Norway

g: Faculty of Medicine, University of Oslo, Norway

**Corresponding author:**

Line Melå Jacobsen

E-mail: [linemjaco@gmail.com](mailto:linemjaco@gmail.com)

Telephone / Fax: +47 23079022 / +47 23016150

Postal address: FORMI, Oslo University Hospital, Building 37 B, PB 4956 Nydalen, 0424 Oslo, Norway

**Key words**

Migraine; headache; endothelial dysfunction; albuminuria

**Word count**

2564 words

## Abstract

**Objective:** To investigate urine albumin leakage as a marker of endothelial dysfunction in migraineurs.

**Design:** A population-based health study

**Participants:** 304 subjects with migraine, 1025 subjects with non-migraine headache and 5428 headache free controls.

**Outcomes:** The association between urine albumin to creatinine ratio (ACR) and headache status was investigated in the Nord-Trøndelag Health Study (HUNT-2). Subjects were selected in two strata, based on either 1) self-reported hypertension/diabetes (morbid sample) or 2) a random sample. Analyses were performed using analysis of covariance.

**Results:** There was no association between headache status and ACR in the study population ( $p=0.23$ , mean ACR for migraine 1.66, 95% CI 1.31-2.01, for non-migraine headache 1.90, 95% CI 1.71-2.09 and for no headache 1.73, 95% CI 1.64-1.81) after relevant adjustments. Similarly, no association between headache status and ACR was seen when the analysis was stratified for morbid and random samples, or for migraine with and without aura.

**Conclusions:** We found no evidence of increased urine albumin leakage in migraineurs when compared to headache free controls. This could indicate that global endothelial dysfunction is not a prominent feature of migraine.

**Article summary****Article focus:**

- We aimed to investigate urine albumin to creatinine ratio (ACR) as a marker of endothelial dysfunction in subjects with migraine, non-migraine headache and headache free controls.

**Key messages:**

- No associations were found between headache status and ACR, implying the absence of large differences in urine albumin leakage between migraineurs or other headache sufferers and headache free controls.
- This may indicate that global endothelial dysfunction is not a prominent feature of migraine.

**Strengths and limitations of this study:**

- The study is the first to assess albumin leakage as a marker of endothelial dysfunction in migraineurs.
- The study includes a relatively large sample size, objective measurements of albumin leakage and the use of validated headache diagnoses.
- The sample size might be too low to detect ACR differences among migraine subtypes. In particular, there was a limited number of migraineurs with aura in this study.

## Introduction

Migraine is a common disabling headache disorder affecting 6-7% of men and 18% of women.<sup>[1]</sup> It is rated as one of the top 10 most disabling diseases<sup>[2, 3]</sup> and has been estimated to be the most costly neurological disorder to society.<sup>[4]</sup> Migraine manifests in headache attacks lasting 4-72 hours characterized by throbbing, pulsating and unilateral headache, often accompanied by nausea and photo- and phonophobia.<sup>[5]</sup> In up to a third of the patients<sup>[6]</sup> these attacks may be accompanied by additional neurological aura symptoms separating the disease into migraine with aura (MA) and migraine without aura (MO).<sup>[5]</sup>

Migraine, in particular MA, has been associated with an increased risk of cardiovascular disease (CVD) including ischemic stroke, ischemic lesions of the brain, myocardial infarction, angina and cardiovascular death.<sup>[7-9]</sup> While the mechanisms underlying this link remain unknown, multiple explanations have been suggested. Shared environmental- or genetic risk factors could be present, changes in vascular function might contribute to migraine pathophysiology or the opposite; migraine pathophysiology could induce changes in vascular function, or mutual mechanistic pathways may exist.<sup>[10]</sup>

The vascular endothelium plays an important role in setting vascular tone, regulating vascular permeability, maintaining trombotic balance and regulating fibrinolytic- and inflammatory pathways. A dysfunctional vascular endothelium is often observed in CVD.<sup>[11]</sup> Interestingly, abnormal control of vascular tone,<sup>[12]</sup> alterations in arterial structure and function<sup>[13]</sup> and impaired ability to repair endothelial injury<sup>[14]</sup> have also been reported in migraine patients. The increase of vasoactive mediators during migraine attacks, including the vasoconstrictive factor ET-1 and the pro-inflammatory factor C-reactive protein (CRP), suggests an

1  
2  
3 involvement of the endothelium in migraine headache.<sup>[15, 16]</sup> Endothelial dysfunction could  
4  
5 also be implicated in the generation of migraine aura as ET-1 has been shown to produce  
6  
7 cortical spreading depression (CSD), the presumed substrate of migraine aura, in rats.<sup>[17]</sup>  
8  
9 Furthermore, migraineurs with aura have an increased risk of thrombotic events. It has been  
10  
11 reported raised plasma levels of vWf in migraine patients,<sup>[18]</sup> a factor that promotes clotting  
12  
13 and formation when the endothelium is damaged, further supporting the presence of  
14  
15 endothelial dysfunction in migraine. This could explain the link between migraine and CVD  
16  
17 and might elucidate pathophysiological mechanisms of migraine.  
18  
19  
20  
21  
22  
23

24 The presence of subclinical increases in urinary albumin excretion (UAE) is believed to  
25  
26 reflect endothelial dysfunction.<sup>[19]</sup> No previous studies have, however, investigated albumin  
27  
28 excretion in migraineurs. The aim of this study was therefore to compare urine albumin to  
29  
30 creatinine ratio (ACR), as a measure of UAE, in subjects with migraine, non-migraine  
31  
32 headache and headache-free controls.  
33  
34  
35  
36  
37  
38  
39  
40  
41  
42  
43  
44  
45  
46  
47  
48  
49  
50  
51  
52  
53  
54  
55  
56  
57  
58  
59  
60

## Methods

### Subjects and headache diagnoses

Subjects were selected from the second Nord-Trøndelag Health Study (HUNT 2), a general health survey conducted in 1995-1997. All inhabitants aged  $\geq 20$  years residing in the county at the time of screening were invited ( $n = 92,703$ ) and 65,258 subjects (70.4%) participated<sup>[20]</sup>. The population in Nord-Trøndelag County is ethnically homogenous with less than 3% non-Caucasians. All participants were mailed a questionnaire and attended a clinical examination, for details see.<sup>[20]</sup> The questionnaire included questions on previous or current CVD, headache disorders, hypertension, diabetes mellitus and smoking habits. The clinical examination included measurements of height, weight and blood pressure. When attending the health examination, participants received a second questionnaire to complete and return by mail. A total of 9,598 participants were included in a further study in which they donated three urine samples for the determination of ACR. Subjects were included based on 1) the presence of self-reported diabetes mellitus and/or medically treated hypertension (morbid sample) and 2) a 5% randomly selected sample of the total population (random sample). Subjects were originally included in a study designed for investigating UAE in hypertension and diabetes. Participants who answered “yes” to the question “Have you suffered from migraine headache during the last 12 months/last year?” were classified as migraine sufferers, those who answered “yes” to the question “Have you suffered from other types of headache during the last 12 months/last year?” were classified as non-migraine headache sufferers and those who answered “no” comprised the headache-free controls. Classification of headache and migraine disorders in HUNT2 was based on a modified version of the International Classification of Headache Disorders (IHDR), validated by interview diagnoses<sup>[21]</sup>. Subjects who contributed with information regarding both headache status and ACR were eligible for the present study. Subjects with overt proteinuria,  $ACR \geq 25\text{mg}/\text{mmol}$  in men and  $\geq$

1  
2  
3 35mg/mmol in women, one subject with migraine (with aura), 16 subjects with non-migraine  
4  
5 headache and 141 subjects without headache, were excluded. In total, 303 subjects with  
6  
7 migraine, 1009 subjects with non-migraine headache and 5287 headache free subjects were  
8  
9 included in the study, in which the morbid sample constituted 3688 medically treated  
10  
11 hypertensive subjects, 647 diabetic subjects and 413 subjects with both medically treated  
12  
13 hypertension and diabetes mellitus.  
14  
15

#### 16 17 18 19 20 Urine sampling

21  
22  
23 Participants received a unit with three plastic receptacles for three first morning urine  
24  
25 samples, three transport tubes and one envelope for returning the samples by mail to the  
26  
27 laboratory. Out of 11661 packs handed out, 9598 (82.3%) participants mailed three samples  
28  
29 back to the laboratory.<sup>[22]</sup> Those who failed to return three samples were excluded. A written  
30  
31 instruction describing how to collect urine, information about the screening and a  
32  
33 questionnaire concerning urinary tract infection in the previous week, persistent hematuria in  
34  
35 the last year and menstruation at the time of collection was included. While the most  
36  
37 consistent method for determining UAE is 24-h urine sampling, it has been shown that  
38  
39 measuring ACR in one or more morning spot urine samples provides good specificity and  
40  
41 sensitivity.<sup>[23]</sup>  
42  
43  
44  
45  
46  
47  
48

#### 49 Laboratory procedures

50  
51  
52 Fresh, non-frozen urine samples were analyzed at the Central Laboratory at Levanger  
53  
54 Hospital on a Hitachi 91 Autoanalyzer (Hitachi, Mito, Japan). Urine albumin and creatinine  
55  
56 levels were determined using an immunoturbimetric method (antihuman serum albumin;  
57  
58  
59  
60



1  
2  
3 Dako Norway, Oslo) and Jaffé method, respectively. The ACR, measured in mg/mmol, was  
4  
5 used as an expression of UAE.  
6  
7  
8  
9

## 10 11 Consent

12  
13  
14 Participation in HUNT2 was voluntary and each participant signed a written consent. All  
15  
16 surveys and analyses were approved by the Norwegian Data Inspectorate and by the Regional  
17  
18 Committee for Medical and Health Research Ethics.  
19

## 20 21 22 23 24 25 Statistical analysis

26  
27  
28 For all analyses we used mean ACR from three delivered urine samples, measured in  
29  
30 mg/mmol. Comparisons of mean ACR between cases with migraine, non-migraine headache  
31  
32 and headache free controls in the morbid, random and combined samples were performed by  
33  
34 analysis of covariance (ANCOVA). The confounding effect of potential confounders, i.e. age,  
35  
36 sex, body mass index (BMI), smoking, self-reported diabetes and self-reported  
37  
38 antihypertensive medication, in the combined sample was calculated by the formula [Mean  
39  
40  $ACR_{crude} - \text{Mean } ACR_{adj}$ ]/Mean  $ACR_{crude}$ , where Mean  $ACR_{crude}$  was the mean ACR in the  
41  
42 crude model and Mean  $ACR_{adj}$  was the mean ACR in the model adjusted for the relevant  
43  
44 variable. Variables with a confounding effect > 5% in one or more headache group were  
45  
46 included in the final model. A *p*-value less than 0.05 was used to indicate statistical  
47  
48 significance.  
49  
50  
51  
52  
53  
54  
55  
56  
57  
58  
59  
60

## Results

Baseline characteristics for the random and morbid samples are shown in table 1. The morbid sample was characterized by a higher age and BMI and a lower proportion of smokers compared to the random sample. For both samples a higher proportion of women had headache than men, with the highest percentage of women found among migraineurs. Mean age was lower in the headache groups than in controls.

Crude analyses indicated an association between ACR and headache status in the morbid sample ( $p=0.013$ , mean ACR for migraine 1.22, for non-migraine headache 1.95 and for no headache 2.03) and the random sample ( $p=0.011$ , mean ACR for migraine 0.85, for non-migraine headache 0.96 and for no headache 1.22), table 2. However, when adjusting for age and sex this effect disappeared (Model I). No significant associations were observed between headache status and ACR in the morbid sample ( $p=0.11$ , mean ACR for migraine 1.87, for non-migraine headache 2.27 and for no headache 1.96) or the random sample ( $p=0.55$ , mean ACR for migraine 1.00, for non-migraine headache 1.07 and for no headache 1.16) when adjusted for age, sex, self-reported diabetes and self-reported use of antihypertensive medication (Model II).

A similar pattern was observed when morbid and random samples were combined; crude data indicated an association between ACR and headache status, but this effect was explained by differences in age and sex, table 3. No significant associations were observed when adjusted for age, sex, self-reported diabetes and self-reported use of antihypertensive medication ( $p=0.23$ , mean ACR for migraine 1.66, for non-migraine headache 1.90 and for no headache 1.73). Mean differences for ACR in the combined sample (Model II) were -0.07 (95% CI -0.43-0.30) between migraineurs and headache-free controls and 0.18 (95% CI -0.04-0.39)

1  
2  
3 between non-migraine headache and headache free controls. We also examined the  
4  
5 association between headache status and ACR after stratification of migraine into its two  
6  
7 subtype's MA and MO. In the adjusted model, no differences in ACR scores were found  
8  
9 between either migraine subtype and controls ( $p=0.68$ , mean ACR for MA 1.36, for MO 1.73  
10  
11 and for no headache 1.73), table 4. There was no interaction between headache status and  
12  
13 self-reported diabetes, or between headache status and self-reported use of antihypertensive  
14  
15 medication on ACR. Since the measurement ACR was positively skewed, we repeated the  
16  
17 analyses after square root transformation, which provided similar results. To ease  
18  
19 interpretation only non-transformed results are presented.  
20  
21  
22  
23  
24  
25  
26  
27  
28  
29  
30  
31  
32  
33  
34  
35  
36  
37  
38  
39  
40  
41  
42  
43  
44  
45  
46  
47  
48  
49  
50  
51  
52  
53  
54  
55  
56  
57  
58  
59  
60

## Discussion

The present study did not find an association between headache status and ACR, indicating the absence of large differences in urine albumin leakage between migraineurs or other headache sufferers and headache free controls. The mechanisms linking migraine and cardiovascular disease are likely complex, but dysregulation of vascular endothelium as expressed by albumin leakage is not supported by the present data to be a major factor.

The study includes a relatively large sample size, objective measurements of UAE, analyses based on fresh urine samples and the use of validated headache diagnoses. Furthermore, the design of the study allowed us to evaluate the association between headache status and UAE in a random sample as well as a morbid sample, which included a high proportion of subjects with hypertension and diabetes type I and II, well known risk factors for increased UAE.<sup>[24-26]</sup> A limitation of the study is, however, that hypertension- and diabetes information was based on self-report. In addition, the sample size might be too low to detect ACR differences among migraine subtypes. In particular, there was a limited number of migraineurs with aura in this study.

A high level of ACR is a risk marker for cardiovascular morbidity and mortality.<sup>[27]</sup> Abnormal albumin levels in urine have also been reported in inflammatory, non-cardiovascular conditions such as rheumatoid arthritis, inflammatory bowel syndrome and surgery, which has been hypothesized to be a result of circulating inflammatory molecules damaging parenchymal functions of the kidneys<sup>[19]</sup>. Interestingly, ACR levels even within the normal range have been associated with an increased rate of kidney disease, cardiovascular disease and mortality.<sup>[28-30]</sup> As UAE is a biological continuum, we used continuous ACR values in the

1  
2  
3 present study rather than applying microalbuminuria commonly defined as  $ACR \geq$   
4  
5 2.5mg/mmol. Mean ACR levels in the morbid group of the present study were twice as high  
6  
7 as for the randomly chosen sample, which is explained by the presence of hypertension and  
8  
9 diabetes. In the random sample, however, ACR was generally low for all headache and  
10  
11 headache-free groups.  
12

13  
14  
15  
16  
17  
18 The unadjusted analysis indicated an association between ACR and headache status in the  
19  
20 morbid-, random and combined samples. However, when adjusting for age and sex the  
21  
22 association disappeared, suggesting these variables to be the major contributing factors for  
23  
24 differences in ACR in the present study. Given the fact that women have less muscular mass  
25  
26 and lower creatinine excretion than men, and that creatinine excretion decreases with age,<sup>[22]</sup> a  
27  
28 confounding effect of age and sex on ACR was not unexpected.  
29  
30  
31  
32  
33  
34

35  
36 Contrary to our hypothesis we did not find urine albumin leakage to be more prominent  
37  
38 among migraineurs than among headache-free subjects. If endothelial dysfunction with  
39  
40 albumin leakage was a feature of migraine, we would expect elevated ACR levels among  
41  
42 migraineurs, and highest among MA. Although we could not find an association between  
43  
44 ACR and migraine status, there was a non-significant tendency in the opposite direction;  
45  
46 subjects with MA had the lowest ACR levels. While many previous studies favor the presence  
47  
48 of endothelial dysfunction in migraineurs, some studies argue against. In fact, endothelium-  
49  
50 dependent vasodilation, nitric oxide levels and stimulated t-PA levels have been found  
51  
52 similarly expressed in migraineurs and healthy controls.<sup>[31-33]</sup> Furthermore, it was recently  
53  
54 suggested that extracranial dilatation may not be relevant for migraine pain during attacks.<sup>[34]</sup>  
55  
56  
57  
58  
59  
60

1  
2  
3 In summary, in this first study examining albumin leakage in migraineurs, we did not find  
4  
5 urine albumin leakage to be more prominent among migraineurs than among headache-free  
6  
7 subjects, which could indicate that global endothelial dysfunction is not a prominent feature  
8  
9 of migraine.  
10  
11  
12  
13  
14  
15  
16  
17  
18  
19  
20  
21  
22  
23  
24  
25  
26  
27  
28  
29  
30  
31  
32  
33  
34  
35  
36  
37  
38  
39  
40  
41  
42  
43  
44  
45  
46  
47  
48  
49  
50  
51  
52  
53  
54  
55  
56  
57  
58  
59  
60

For peer review only

**Contributors:**

LMJ contributed to the study design, data analysis, data interpretations and wrote the manuscript. BSW contributed to the data analysis, data interpretations and the drafting of the manuscript. SR and JH conceived the original study, provided laboratory resources and contributed to the manuscript. AHP contributed to the data analysis, data interpretations and the manuscript. JAZ contributed to the study design, data interpretations and the manuscript. All authors approved the final version of the manuscript.

**Funding:**

The present study was funded by South-Eastern Norway Regional Health Authority, which had no role in the design or conduct of the study. The Nord-Trøndelag Health Study (HUNT) is a collaboration between HUNT Research Centre, Faculty of Medicine, Norwegian University of Science and Technology (NTNU, Levanger), Norwegian Institute of Public Health and Nord-Trøndelag County Council.

**Competing interests:**

None

**Ethics approval:**

The Norwegian Data Inspectorate and the Regional Committee for Medical and Health Research Ethics approved the study.

1  
2  
3  
4  
5  
6  
7  
8  
9  
10  
11  
12  
13  
14  
15  
16  
17  
18  
19  
20  
21  
22  
23  
24  
25  
26  
27  
28  
29  
30  
31  
32  
33  
34  
35  
36  
37  
38  
39  
40  
41  
42  
43  
44  
45  
46  
47  
48  
49  
50  
51  
52  
53  
54  
55  
56  
57  
58  
59  
60

**Provenance and peer review**

Not commissioned; externally peer reviewed

**Data sharing statement**

No additional data are available.

For peer review only



## References

1. Stovner LJ and Andree C. Prevalence of headache in Europe: a review for the Eurolight project. *J Headache Pain* 2010;**11**(4):289-99.
2. Vos T, Flaxman AD, Naghavi M, *et al.* Years lived with disability (YLDs) for 1160 sequelae of 289 diseases and injuries 1990-2010: a systematic analysis for the Global Burden of Disease Study 2010. *Lancet* 2012;**380**(9859):2163-96.
3. Steiner TJ, Stovner LJ and Birbeck GL. Migraine: the seventh disabler. *Headache* 2013;**53**(2):227-9.
4. Andlin-Sobocki P, Jonsson B, Wittchen HU, *et al.* Cost of disorders of the brain in Europe. *Eur J Neurol* 2005;**12 Suppl 1**:1-27.
5. Headache Classification Subcommittee of the International Headache S. The International Classification of Headache Disorders: 2nd edition. *Cephalalgia* 2004;**24 Suppl 1**:9-160.
6. Lipton RB, Stewart WF, Diamond S, *et al.* Prevalence and burden of migraine in the United States: data from the American Migraine Study II. *Headache* 2001;**41**(7):646-57.
7. Schurks M, Rist PM, Bigal ME, *et al.* Migraine and cardiovascular disease: systematic review and meta-analysis. *BMJ* 2009;**339**:b3914.
8. Kruit MC, van Buchem MA, Hofman PA, *et al.* Migraine as a risk factor for subclinical brain lesions. *JAMA* 2004;**291**(4):427-34.
9. Gudmundsson LS, Scher AI, Aspelund T, *et al.* Migraine with aura and risk of cardiovascular and all cause mortality in men and women: prospective cohort study. *BMJ* 2010;**341**:c3966.
10. Bigal ME, Kurth T, Hu H, *et al.* Migraine and cardiovascular disease: possible mechanisms of interaction. *Neurology* 2009;**72**(21):1864-71.
11. Cai H and Harrison DG. Endothelial dysfunction in cardiovascular diseases: the role of oxidant stress. *Circ Res* 2000;**87**(10):840-4.
12. Schwedt TJ. Endothelial dysfunction in migraine. *Cephalalgia* 2009;**29**(9):997-1002.
13. Yetkin E, Ozisik H, Ozcan C, *et al.* Increased dilator response to nitrate and decreased flow-mediated dilatation in migraineurs. *Headache* 2007;**47**(1):104-10.
14. Lee ST, Chu K, Jung KH, *et al.* Decreased number and function of endothelial progenitor cells in patients with migraine. *Neurology* 2008;**70**(17):1510-7.
15. Gallai V, Sarchielli P, Firenze C, *et al.* Endothelin 1 in migraine and tension-type headache. *Acta Neurol Scand* 1994;**89**(1):47-55.
16. Tietjen GE, Herial NA, White L, *et al.* Migraine and biomarkers of endothelial activation in young women. *Stroke* 2009;**40**(9):2977-82.
17. Dreier JP, Kleeberg J, Petzold G, *et al.* Endothelin-1 potently induces Leao's cortical spreading depression in vivo in the rat: a model for an endothelial trigger of migrainous aura? *Brain* 2002;**125**(Pt 1):102-12.
18. Tietjen GE, Al-Qasbi MM, Athanas K, *et al.* Increased von Willebrand factor in migraine. *Neurology* 2001;**57**(2):334-6.
19. Pedrinelli R, Dell'Omo G, Penno G, *et al.* Non-diabetic microalbuminuria, endothelial dysfunction and cardiovascular disease. *Vasc Med* 2001;**6**(4):257-64.
20. Holmen J, Midthjell K, Krüger Ø, *et al.* The Nord-Trøndelag Health Study 1995-97 (HUNT2): Objectives, contents, methods and participation. *Norsk Epidemiologi* 2003;**13**(1):19-32.
21. Hagen K, Zwart JA, Vatten L, *et al.* Head-HUNT: validity and reliability of a headache questionnaire in a large population-based study in Norway. *Cephalalgia* 2000;**20**(4):244-51.
22. Hallan H, Romundstad S, Kvenild K, *et al.* Microalbuminuria in diabetic and hypertensive patients and the general population--consequences of various diagnostic criteria--the Nord-Trøndelag Health Study (HUNT). *Scand J Urol Nephrol* 2003;**37**(2):151-8.
23. Jensen JS, Clausen P, Borch-Johnsen K, *et al.* Detecting microalbuminuria by urinary albumin/creatinine concentration ratio. *Nephrol Dial Transplant* 1997;**12 Suppl 2**:6-9.

- 1
- 2
- 3 24. Viberti GC, Hill RD, Jarrett RJ, *et al.* Microalbuminuria as a predictor of clinical nephropathy in
- 4 insulin-dependent diabetes mellitus. *Lancet* 1982;**1**(8287):1430-2.
- 5 25. Diener HC and Kurth T. Is migraine a risk factor for stroke? *Neurology* 2005;**64**(9):1496-7.
- 6 26. Cerasola G, Cottone S, Mule G, *et al.* Microalbuminuria, renal dysfunction and cardiovascular
- 7 complication in essential hypertension. *J Hypertens* 1996;**14**(7):915-20.
- 8 27. Kuritzky L, Toto R and Van Buren P. Identification and management of albuminuria in the
- 9 primary care setting. *J Clin Hypertens (Greenwich)* 2011;**13**(6):438-49.
- 10 28. Romundstad S, Holmen J, Kvenild K, *et al.* Microalbuminuria and all-cause mortality in 2,089
- 11 apparently healthy individuals: a 4.4-year follow-up study. The Nord-Trondelag Health Study
- 12 (HUNT), Norway. *Am J Kidney Dis* 2003;**42**(3):466-73.
- 13 29. Chronic Kidney Disease Prognosis C, Matsushita K, van der Velde M, *et al.* Association of
- 14 estimated glomerular filtration rate and albuminuria with all-cause and cardiovascular
- 15 mortality in general population cohorts: a collaborative meta-analysis. *Lancet*
- 16 2010;**375**(9731):2073-81.
- 17 30. Klausen K, Borch-Johnsen K, Feldt-Rasmussen B, *et al.* Very low levels of microalbuminuria
- 18 are associated with increased risk of coronary heart disease and death independently of
- 19 renal function, hypertension, and diabetes. *Circulation* 2004;**110**(1):32-5.
- 20 31. Vanmolkot FH and de Hoon JN. Endothelial function in migraine: a cross-sectional study. *BMC*
- 21 *Neurol* 2010;**10**:119.
- 22 32. Silva FA, Rueda-Clausen CF, Silva SY, *et al.* Endothelial function in patients with migraine
- 23 during the interictal period. *Headache* 2007;**47**(1):45-51.
- 24 33. Perko D, Pretnar-Oblak J, Sabovic M, *et al.* Endothelium-dependent vasodilatation in
- 25 migraine patients. *Cephalalgia* 2011;**31**(6):654-60.
- 26 34. Amin FM, Asghar MS, Hougaard A, *et al.* Magnetic resonance angiography of intracranial and
- 27 extracranial arteries in patients with spontaneous migraine without aura: a cross-sectional
- 28 study. *Lancet Neurol* 2013;**12**(5):454-61.
- 29
- 30
- 31
- 32
- 33
- 34
- 35
- 36
- 37
- 38
- 39
- 40
- 41
- 42
- 43
- 44
- 45
- 46
- 47
- 48
- 49
- 50
- 51
- 52
- 53
- 54
- 55
- 56
- 57
- 58
- 59
- 60

Table 1: Clinical profile of the study participants

|                               | No headache | Non-migraine headache | Migraine    |
|-------------------------------|-------------|-----------------------|-------------|
| <b>Morbid sample (n=4748)</b> |             |                       |             |
| Women (%)                     | 51.7        | 60.2                  | 69.8        |
| Mean age (SD)                 | 67.0 (11.2) | 58.7 (12.9)           | 51.5 (12.5) |
| Antihypertensive use (%)      | 86.9        | 84.4                  | 83.0        |
| Diabetes (%)                  | 22.5        | 22.5                  | 20.9        |
| Daily smokers (%)             | 19.3        | 24.6                  | 23.1        |
| Mean Body-mass index (SD)     | 28.6 (4.5)  | 29.0 (4.9)            | 28.7 (4.8)  |
| <b>Random sample (n=1851)</b> |             |                       |             |
| Women (%)                     | 46.8        | 63.2                  | 75.0        |
| Mean age (SD)                 | 53.9 (16.5) | 43.6 (13.7)           | 39.6 (11.1) |
| Antihypertensive use (%)      | 13.1        | 7.2                   | 7.0         |
| Diabetes (%)                  | 4.1         | 1.2                   | 0.0         |
| Daily smokers (%)             | 27.3        | 33.3                  | 34.8        |
| Mean Body-mass index (SD)     | 26.5 (4.0)  | 26.1 (4.0)            | 25.8 (3.8)  |

SD: standard deviation.

Table 2. Albumin/Creatinine ratio by headache status and selection criterium

|                       | <b>Crude</b>                |                    | <b>Model I<sup>C</sup></b>  |                    | <b>Model II<sup>D</sup></b> |                    |
|-----------------------|-----------------------------|--------------------|-----------------------------|--------------------|-----------------------------|--------------------|
|                       | mean ACR<br>(95% CI)<br>N   | p-value            | mean ACR<br>(95% CI)<br>N   | p-value            | mean ACR<br>(95% CI)<br>N   | p-value            |
| <b>Morbid sample</b>  |                             | 0.013 <sup>A</sup> |                             | 0.13 <sup>A</sup>  |                             | 0.11 <sup>A</sup>  |
| No headache           | 2.03<br>(1.92-2.14)<br>3998 |                    | 1.96<br>(1.85-2.07)<br>3998 |                    | 1.96<br>(1.85-2.06)<br>3978 |                    |
| Non-migraine headache | 1.95<br>(1.68-2.23)<br>591  | 0.61 <sup>B</sup>  | 2.26<br>(1.97-2.54)<br>591  | 0.057 <sup>B</sup> | 2.27<br>(1.99-2.55)<br>585  | 0.044 <sup>B</sup> |
| Migraine              | 1.22<br>(0.68-1.75)<br>159  | 0.003 <sup>B</sup> | 1.85<br>(1.31-2.40)<br>159  | 0.70 <sup>B</sup>  | 1.87<br>(1.33-2.41)<br>158  | 0.75 <sup>B</sup>  |
| <b>Random sample</b>  |                             | 0.011 <sup>A</sup> |                             | 0.60 <sup>A</sup>  |                             | 0.55 <sup>A</sup>  |
| No headache           | 1.22<br>(1.11-1.32)<br>1289 |                    | 1.16<br>(1.06-1.27)<br>1289 |                    | 1.16<br>(1.05-1.26)<br>1285 |                    |
| Non-migraine headache | 0.96<br>(0.77-1.14)<br>418  | 0.017 <sup>B</sup> | 1.08<br>(0.89-1.26)<br>418  | 0.44 <sup>B</sup>  | 1.07<br>(0.89-1.26)<br>417  | 0.44 <sup>B</sup>  |
| Migraine              | 0.85<br>(0.53-1.16)<br>144  | 0.028 <sup>B</sup> | 1.02<br>(0.70-1.34)<br>144  | 0.41 <sup>B</sup>  | 1.00<br>(0.68-1.31)<br>143  | 0.35 <sup>B</sup>  |

<sup>A</sup>p-value for overall effect of headache groups.

<sup>B</sup>p-values are for comparison against no headache group within the same selection criterium.

<sup>C</sup>Model I: Adjusted for age and sex.

<sup>D</sup>Model II: Adjusted for age, sex, self-reported diabetes and self-reported use of antihypertensive medication.

Table 3: Albumin/Creatinine ratio by headache status in combined sample

|                       | <b>Crude</b>                |                     | <b>Model I<sup>C</sup></b>  |                   | <b>Model II<sup>D</sup></b> |                   |
|-----------------------|-----------------------------|---------------------|-----------------------------|-------------------|-----------------------------|-------------------|
|                       | mean ACR<br>(95% CI)<br>N   | p-value             | mean ACR<br>(95% CI)<br>N   | p-value           | mean ACR<br>(95% CI)<br>N   | p-value           |
|                       |                             | <0.001 <sup>A</sup> |                             | 0.29 <sup>A</sup> |                             | 0.23 <sup>A</sup> |
| No headache           | 1.83<br>(1.75-1.92)<br>5287 |                     | 1.73<br>(1.65-1.81)<br>5287 |                   | 1.73<br>(1.64-1.81)<br>5263 |                   |
| Non-migraine headache | 1.54<br>(1.35-1.73)<br>1009 | 0.007 <sup>B</sup>  | 1.89<br>(1.69-2.09)<br>1009 | 0.15              | 1.90<br>(1.71-2.09)<br>1002 | 0.11 <sup>B</sup> |
| Migraine              | 1.04<br>(0.69-1.39)<br>303  | <0.001 <sup>B</sup> | 1.67<br>(1.31-2.03)<br>303  | 0.74              | 1.66<br>(1.31-2.01)<br>301  | 0.72 <sup>B</sup> |

<sup>A</sup>p-value for overall effect of headache groups.

<sup>B</sup>p-values are for comparison against no headache group.

<sup>C</sup>Model I: Adjusted for age and sex.

<sup>D</sup>Model II: Adjusted for age, sex, self-reported diabetes and self-reported use of antihypertensive medication.

Table 4: Albumin/Creatinine ratio by migraine subtypes

|                       | <b>Crude</b>                |                     | <b>Model I<sup>C</sup></b>  |                   | <b>Model II<sup>D</sup></b> |                   |
|-----------------------|-----------------------------|---------------------|-----------------------------|-------------------|-----------------------------|-------------------|
|                       | mean ACR<br>(95% CI)<br>N   | p-value             | mean ACR<br>(95% CI)<br>N   | p-value           | mean ACR<br>(95% CI)<br>N   | p-value           |
|                       |                             | <0.001 <sup>A</sup> |                             | 0.78 <sup>A</sup> |                             | 0.68 <sup>A</sup> |
| No headache           | 1.83<br>(1.75-1.92)<br>5287 |                     | 1.73<br>(1.65-1.81)<br>5287 |                   | 1.73<br>(1.64-1.81)<br>5263 |                   |
| Migraine without aura | 1.05<br>(0.66-1.44)<br>244  | <0.001 <sup>B</sup> | 1.73<br>(1.33-2.122)<br>244 | 0.88 <sup>B</sup> | 1.73<br>(1.34-2.13)<br>242  | 0.85 <sup>B</sup> |
| Migraine with aura    | 1.00<br>(0.21-1.80)<br>59   | 0.042 <sup>B</sup>  | 1.43<br>(0.64-2.22)<br>59   | 0.49 <sup>B</sup> | 1.36<br>(0.59-2.13)<br>59   | 0.39 <sup>B</sup> |

<sup>A</sup>p-value for overall effect of headache groups.

<sup>B</sup>p-values are for comparison against controls.

<sup>C</sup>Model I: Adjusted for age and sex.

<sup>D</sup>Model II: Adjusted for age, sex, self-reported diabetes and self-reported use of antihypertensive medication.

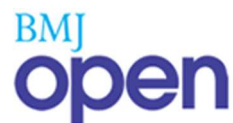

**Urinary albumin excretion as a marker of endothelial dysfunction in migraine sufferers; the HUNT study, Norway**

|                                 |                                                                                                                                                                                                                                                                                                                                                                                                                                                                                                                                                                               |
|---------------------------------|-------------------------------------------------------------------------------------------------------------------------------------------------------------------------------------------------------------------------------------------------------------------------------------------------------------------------------------------------------------------------------------------------------------------------------------------------------------------------------------------------------------------------------------------------------------------------------|
| Journal:                        | <i>BMJ Open</i>                                                                                                                                                                                                                                                                                                                                                                                                                                                                                                                                                               |
| Manuscript ID:                  | bmjopen-2013-003268.R1                                                                                                                                                                                                                                                                                                                                                                                                                                                                                                                                                        |
| Article Type:                   | Research                                                                                                                                                                                                                                                                                                                                                                                                                                                                                                                                                                      |
| Date Submitted by the Author:   | 04-Jul-2013                                                                                                                                                                                                                                                                                                                                                                                                                                                                                                                                                                   |
| Complete List of Authors:       | Jacobsen, Line; Oslo University Hospital, FORMI<br>Winsvold, Bendik; Oslo University Hospital, FORMI<br>Romunstad, Solfrid; Norwegian University of Science and Technology, Department of Cancer Research and Molecular Medicine<br>Pripp, Are; Oslo University Hospital, Department of Biostatistics, Epidemiology & Health Economy<br>Holmen, Jostein; HUNT Research Centre, Norwegian University of Science and Technology, Department of Public Health and General Practic<br>Zwart, John-Anker; Oslo University Hospital, FORMI; University of Oslo, Faculty of Medicine |
| <b>Primary Subject Heading</b>: | Neurology                                                                                                                                                                                                                                                                                                                                                                                                                                                                                                                                                                     |
| Secondary Subject Heading:      | Epidemiology                                                                                                                                                                                                                                                                                                                                                                                                                                                                                                                                                                  |
| Keywords:                       | Migraine < NEUROLOGY, Neurobiology < BASIC SCIENCES, VASCULAR MEDICINE                                                                                                                                                                                                                                                                                                                                                                                                                                                                                                        |
|                                 |                                                                                                                                                                                                                                                                                                                                                                                                                                                                                                                                                                               |

SCHOLARONE™  
Manuscripts

Only

**Title page****Title**

Urinary albumin excretion as a marker of endothelial dysfunction in migraine sufferers; the HUNT study, Norway

**Authors**

Line Melå Jacobsen<sup>a</sup>, Bendik S Winsvold<sup>ab</sup>, Solfrid Romundstad<sup>cd</sup>, Are Hugo Pripp<sup>e</sup>, Jostein Holmen<sup>f</sup>, John-Anker Zwart<sup>abg</sup>

**Affiliations**

a: FORMI, Oslo University Hospital, Oslo, Norway

b: Department of Neurology, Oslo University Hospital, Oslo, Norway

c: Department of Cancer Research and Molecular Medicine, Norwegian University of Science and Technology, Trondheim, Norway

d: Department of Internal Medicine, Levanger Hospital, Health Trust Nord-Trøndelag, Levanger, Norway

e: Department of Biostatistics, Epidemiology & Health Economy, Oslo University Hospital, Oslo, Norway

f: HUNT Research Centre, Department of Public Health and General Practice, Norwegian University of Science and Technology, Levanger, Norway

g: Faculty of Medicine, University of Oslo, Norway

**Corresponding author:**

Line Melå Jacobsen

E-mail: [linemjaco@gmail.com](mailto:linemjaco@gmail.com)

Telephone / Fax: +47 23079022 / +47 23016150

Postal address: FORMI, Oslo University Hospital, Building 37 B, PB 4956 Nydalen, 0424 Oslo, Norway

**Key words**

Migraine; headache; endothelial dysfunction; albuminuria

**Word count**

2671 words



## Abstract

**Objective:** To investigate urine albumin leakage as a marker of endothelial dysfunction in migraine subjects.

**Design:** A population-based health study

**Participants:** 303 subjects with migraine, 1009 subjects with non-migraine headache and 5287 headache free controls.

**Outcomes:** The association between urine albumin to creatinine ratio (ACR) and headache status was investigated in the Nord-Trøndelag Health Study (HUNT-2). Subjects were selected in two strata, based on either 1) self-reported hypertension/diabetes (morbid sample) or 2) a random sample. Analyses were performed using analysis of covariance.

**Results:** There was no association between headache status and ACR in the study population ( $p=0.23$ , mean ACR for migraine 1.66, 95% CI 1.31-2.01, for non-migraine headache 1.90, 95% CI 1.71-2.09 and for no headache 1.73, 95% CI 1.64-1.81) after relevant adjustments. Similarly, no association between headache status and ACR was seen when the analysis was stratified for morbid and random samples, or for migraine with and without aura.

**Conclusions:** We found no evidence of increased urine albumin leakage in migraine sufferers when compared to headache free controls. This could indicate that systemic endothelial dysfunction is not a prominent feature of migraine.

**Article summary****Article focus:**

- We aimed to investigate urine albumin to creatinine ratio (ACR) as a marker of endothelial dysfunction in subjects with migraine, non-migraine headache and headache free controls.

**Key messages:**

- No associations were found between headache status and ACR, implying the absence of large differences in urine albumin leakage between migraine subjects or other headache sufferers and headache free controls.
- This may indicate that systemic endothelial dysfunction is not a prominent feature of migraine.

**Strengths and limitations of this study:**

- The study is the first to assess albumin leakage as a marker of endothelial dysfunction in migraine subjects.
- The study includes a relatively large sample size, objective measurements of albumin leakage and the use of validated headache diagnoses.
- The sample size might be too low to detect ACR differences among migraine subtypes. In particular, there was a limited number of subjects having migraine with aura in this study.

## Introduction

Migraine is a common disabling headache disorder affecting 6-7% of men and 18% of women.<sup>1</sup> It is rated as one of the top 10 most disabling diseases<sup>2,3</sup> and has been estimated to be the most costly neurological disorder to society.<sup>4</sup> Migraine manifests in headache attacks lasting 4-72 hours characterized by throbbing, pulsating and unilateral headache, often accompanied by nausea and photo- and phonophobia.<sup>5</sup> In up to a third of the patients<sup>6</sup> these attacks may be accompanied by additional neurological aura symptoms separating the disease into migraine with aura (MA) and migraine without aura (MO).<sup>5</sup>

Migraine, in particular MA, has been associated with an increased risk of cardiovascular disease (CVD) including ischemic stroke, ischemic lesions of the brain, myocardial infarction, angina and cardiovascular death.<sup>7-9</sup> While the mechanisms underlying this link remain unknown, multiple explanations have been suggested. Shared environmental- or genetic risk factors could be present, changes in vascular function might contribute to migraine pathophysiology or the opposite; migraine pathophysiology could induce changes in vascular function, or mutual mechanistic pathways may exist.<sup>10</sup>

The vascular endothelium plays an important role in setting vascular tone, regulating vascular permeability, maintaining trombotic balance and regulating fibrinolytic- and inflammatory pathways. A dysfunctional vascular endothelium is often observed in CVD.<sup>11</sup> Interestingly, abnormal control of systemic vascular tone,<sup>12</sup> alterations in systemic arterial structure and function<sup>13</sup> and impaired ability to repair systemic endothelial injury<sup>14</sup> have also been reported in migraine patients. The increase of systemic vasoactive mediators during migraine attacks, including the vasoconstrictive factor ET-1 and the pro-inflammatory factor C-reactive protein

1  
2  
3 (CRP), suggests an involvement of the endothelium in migraine headache.<sup>15,16</sup> Endothelial  
4  
5 dysfunction could also be implicated in the generation of migraine aura as ET-1 has been  
6  
7 shown to produce cortical spreading depression (CSD), the presumed substrate of migraine  
8  
9 aura, in rats.<sup>17</sup> Furthermore, migraine patients with aura have an increased risk of thrombotic  
10  
11 events. It has been reported raised plasma levels of vWf in migraine patients,<sup>18</sup> a factor that  
12  
13 promotes clotting and formation when the endothelium is damaged, further supporting the  
14  
15 presence of endothelial dysfunction in migraine. This could explain the link between migraine  
16  
17 and CVD and might elucidate pathophysiological mechanisms of migraine.  
18  
19  
20  
21  
22  
23

24 The presence of subclinical increases in urinary albumin excretion (UAE) has been associated  
25  
26 with impaired endothelium-dependent vasodilatation<sup>19</sup> and is believed to reflect endothelial  
27  
28 dysfunction.<sup>20,21</sup> No previous studies have, however, investigated albumin excretion in  
29  
30 migraine subjects. The aim of this study was therefore to compare urine albumin to creatinine  
31  
32 ratio (ACR), as a measure of UAE, in subjects with migraine, non-migraine headache and  
33  
34 headache-free controls.  
35  
36  
37  
38  
39  
40  
41  
42  
43  
44  
45  
46  
47  
48  
49  
50  
51  
52  
53  
54  
55  
56  
57  
58  
59  
60

## Methods

### Subjects and headache diagnoses

Subjects were selected from the second Nord-Trøndelag Health Study (HUNT 2), a general health survey conducted in 1995-1997. All inhabitants aged  $\geq 20$  years residing in the county at the time of screening were invited ( $n = 92,703$ ) and 65,258 subjects (70.4%) participated.

<sup>22</sup>. The population in Nord-Trøndelag County is ethnically homogenous with less than 3% non-Caucasians. All participants were mailed a questionnaire and attended a clinical examination, for details see.<sup>22</sup> The questionnaire included questions on previous or current CVD, hypertension, diabetes mellitus and smoking habits as well as 13 headache questions. The clinical examination included measurements of height, weight and blood pressure. When attending the health examination, participants received a second questionnaire to complete and return by mail. The 13 headache questions of the questionnaire were designed mainly to determine whether the individual had headache, the frequency of headache, and to diagnose migraine according to a modified version of the ICHD migraine criteria.<sup>23,24</sup> Subjects who answered "yes" to the question "Have you suffered from headache during the last 12 months?" were classified as headache sufferers. Those who answered "no" comprised the headache free control group. Based on the subsequent 12 headache questions headache sufferers were classified as having migraine if they fulfilled the following three criteria: 1) Headache attacks lasting 4 to 72 hours (less than 4 hours was accepted for those who reported often visual disturbances before headache). 2) Headache with at least one of the following characteristics: pulsating quality, unilateral location, aggravation by physical activity. 3) During headache, at least one of the following: nausea, photophobia or phonophobia. Those within this group who reported often having visual disturbance prior to headache were classified as having MA. Headache sufferers who did not fulfil the criteria for migraine and did not have self-reported migraine were classified as having non-migraine headache.

1  
2  
3 Headache diagnoses were mutually exclusive. The headache diagnoses were validated by  
4  
5 clinical interviews by physicians with long clinical experience in headache disorders. The  
6  
7 positive and negative predictive values of the questionnaire-based diagnoses were,  
8  
9 respectively 68% and 76% for non-migraine headache, 87% and 75% for migraine, and 100%  
10  
11 and 91% for MA. A total of 9,598 participants were included in a further study in which they  
12  
13 donated three urine samples for the determination of ACR, originally designed for  
14  
15 investigating UAE in hypertension and diabetes. Subjects were included based on 1) the  
16  
17 presence of self-reported diabetes mellitus and/or medically treated hypertension (morbid  
18  
19 sample) and 2) a 5% randomly selected sample of the total population (random sample).  
20  
21 Participants who contributed with information regarding both headache status and ACR were  
22  
23 eligible for the present study. Subjects with overt proteinuria,  $ACR \geq 25\text{mg}/\text{mmol}$  in men and  
24  
25  $\geq 35\text{mg}/\text{mmol}$  in women, one subject with migraine (with aura), 16 subjects with non-  
26  
27 migraine headache and 141 subjects without headache, were excluded. In total, 303 subjects  
28  
29 with migraine, 1009 subjects with non-migraine headache and 5287 headache free subjects  
30  
31 were included in the study, in which the morbid sample constituted 3688 medically treated  
32  
33 hypertensive subjects, 647 diabetic subjects and 413 subjects with both medically treated  
34  
35 hypertension and diabetes mellitus.  
36  
37  
38  
39  
40  
41  
42  
43  
44

#### 45 Urine sampling

46  
47 Participants received a unit with three plastic receptacles for three first morning urine  
48  
49 samples, three transport tubes and one envelope for returning the samples by mail to the  
50  
51 laboratory. Out of 11661 packs handed out, 9598 (82.3%) participants mailed three samples  
52  
53 back to the laboratory.<sup>25</sup> Those who failed to return three samples were excluded. A written  
54  
55 instruction describing how to collect urine, information about the screening and a  
56  
57  
58  
59  
60

1  
2  
3 questionnaire concerning urinary tract infection in the previous week, persistent hematuria in  
4  
5 the last year and menstruation at the time of collection was included. While the most  
6  
7 consistent method for determining UAE is 24-h urine sampling, it has been shown that  
8  
9 measuring ACR in one or more morning spot urine samples provides good specificity and  
10  
11 sensitivity.<sup>26</sup>  
12

### 13 14 15 16 17 18 Laboratory procedures

19  
20 Fresh, non-frozen urine samples were analyzed at the Central Laboratory at Levanger  
21  
22 Hospital on a Hitachi 91 Autoanalyzer (Hitachi, Mito, Japan). Urine albumin and creatinine  
23  
24 levels were determined using an immunoturbimetric method (antihuman serum albumin;  
25  
26 Dako Norway, Oslo) and Jaffé method, respectively. The ACR, measured in mg/mmol, was  
27  
28 used as an expression of UAE.  
29  
30  
31  
32  
33  
34  
35

### 36 Consent

37  
38 Participation in HUNT2 was voluntary and each participant signed a written consent. All  
39  
40 surveys and analyses were approved by the Norwegian Data Inspectorate and by the Regional  
41  
42 Committee for Medical and Health Research Ethics.  
43  
44  
45  
46  
47  
48

### 49 Statistical analysis

50  
51 For all analyses we used mean ACR from three delivered urine samples, measured in  
52  
53 mg/mmol. Comparisons of mean ACR between cases with migraine, non-migraine headache  
54  
55 and headache free controls in the morbid, random and combined samples were performed by  
56  
57  
58  
59  
60

1  
2  
3 analysis of covariance (ANCOVA). The confounding effect of potential confounders, i.e. age,  
4 sex, body mass index (BMI), smoking, self-reported diabetes and self-reported  
5 antihypertensive medication, in the combined sample was calculated by the formula [Mean  
6  $ACR_{crude} - \text{Mean } ACR_{adj}$ ]/Mean  $ACR_{crude}$ , where Mean  $ACR_{crude}$  was the mean ACR in the  
7 crude model and Mean  $ACR_{adj}$  was the mean ACR in the model adjusted for the relevant  
8 variable. Variables with a confounding effect > 5% in one or more headache group were  
9 included in the final model. A *p*-value less than 0.05 was used to indicate statistical  
10 significance.  
11  
12  
13  
14  
15  
16  
17  
18  
19  
20  
21  
22  
23  
24  
25  
26  
27  
28  
29  
30  
31  
32  
33  
34  
35  
36  
37  
38  
39  
40  
41  
42  
43  
44  
45  
46  
47  
48  
49  
50  
51  
52  
53  
54  
55  
56  
57  
58  
59  
60



## Results

Baseline characteristics for the random and morbid samples are shown in table 1. The morbid sample was characterized by a higher age and BMI and a lower proportion of smokers compared to the random sample. For both samples a higher proportion of women had headache than men, with the highest percentage of women found among the migraine subjects. Mean age was lower in the headache groups than in controls.

Crude analyses indicated an association between ACR and headache status in the morbid sample ( $p=0.013$ , mean ACR for migraine 1.22, for non-migraine headache 1.95 and for no headache 2.03) and the random sample ( $p=0.011$ , mean ACR for migraine 0.85, for non-migraine headache 0.96 and for no headache 1.22), table 2. However, when adjusting for age and sex this effect disappeared (Model I). No significant associations were observed between headache status and ACR in the morbid sample ( $p=0.11$ , mean ACR for migraine 1.87, for non-migraine headache 2.27 and for no headache 1.96) or the random sample ( $p=0.55$ , mean ACR for migraine 1.00, for non-migraine headache 1.07 and for no headache 1.16) when adjusted for age, sex, self-reported diabetes and self-reported use of antihypertensive medication (Model II).

A similar pattern was observed when morbid and random samples were combined; crude data indicated an association between ACR and headache status, but this effect was explained by differences in age and sex, table 3. No significant associations were observed when adjusted for age, sex, self-reported diabetes and self-reported use of antihypertensive medication ( $p=0.23$ , mean ACR for migraine 1.66, for non-migraine headache 1.90 and for no headache 1.73). Mean differences for ACR in the combined sample (Model II) were -0.07 (95% CI -0.43-0.30) between migraine subjects and headache-free controls and 0.18 (95% CI -0.04-

1  
2  
3 0.39) between non-migraine headache and headache free controls. We also examined the  
4  
5 association between headache status and ACR after stratification of migraine into its two  
6  
7 subtype's MA and MO. In the adjusted model, no differences in ACR scores were found  
8  
9 between either migraine subtype and controls ( $p=0.68$ , mean ACR for MA 1.36, for MO 1.73  
10  
11 and for no headache 1.73), table 4. There was no interaction between headache status and  
12  
13 self-reported diabetes, or between headache status and self-reported use of antihypertensive  
14  
15 medication on ACR. Since the measurement ACR was positively skewed, we repeated the  
16  
17 analyses after square root transformation, which provided similar results. To ease  
18  
19 interpretation only non-transformed results are presented.  
20  
21  
22  
23  
24  
25  
26  
27  
28  
29  
30  
31  
32  
33  
34  
35  
36  
37  
38  
39  
40  
41  
42  
43  
44  
45  
46  
47  
48  
49  
50  
51  
52  
53  
54  
55  
56  
57  
58  
59  
60

## Discussion

The present study did not find an association between headache status and ACR, indicating the absence of large differences in urine albumin leakage between migraine subjects or other headache sufferers and headache free controls. The mechanisms linking migraine and cardiovascular disease are likely complex, but dysregulation of vascular endothelium as expressed by albumin leakage is not supported by the present data to be a major factor.

The study includes a relatively large sample size, objective measurements of UAE, analyses based on fresh urine samples and the use of validated headache diagnoses. Furthermore, the design of the study allowed us to evaluate the association between headache status and UAE in a random sample as well as a morbid sample, which included a high proportion of subjects with hypertension and diabetes type I and II, well known risk factors for increased UAE.<sup>27-29</sup> A limitation of the study is, however, that hypertension- and diabetes information was based on self-report. Data on subjects' migraine status (ictal or interictal phase) during urine sampling was not available and it cannot be excluded that there may be a difference in urine albumin leakage during and outside a migraine attack. In addition, the sample size might be too low to detect ACR differences among migraine subtypes. In particular, there was a limited number of subjects having migraine with aura in this study.

A high level of urine ACR, most likely representing excessive glomerular capillary leakage of albumin,<sup>19</sup> is a risk marker for cardiovascular morbidity and mortality<sup>30</sup> and is believed to reflect endothelial dysfunction.<sup>19,21</sup> Increased UAE has been associated with impaired endothelium-dependent vasodilatation<sup>19</sup>, impaired peripheral vasoreactivity to endothelial agonists<sup>31</sup> as well as with circulating biomarkers of endothelial dysfunction.<sup>32</sup> Abnormal ACR

1  
2  
3 levels in urine have also been reported in inflammatory, non-cardiovascular conditions such  
4  
5 as rheumatoid arthritis, inflammatory bowel syndrome and surgery, which has been  
6  
7 hypothesized to be a result of circulating inflammatory molecules damaging parenchymal  
8  
9 functions of the kidneys.<sup>20</sup> Interestingly, ACR levels even within the normal range have been  
10  
11 associated with an increased rate of kidney disease, cardiovascular disease and mortality.<sup>33-35</sup>  
12  
13 As UAE is a biological continuum, we used continuous ACR values in the present study  
14  
15 rather than applying microalbuminuria commonly defined as  $ACR \geq 2.5\text{mg}/\text{mmol}$ . Mean  
16  
17 ACR levels in the morbid group of the present study were twice as high as for the randomly  
18  
19 chosen sample, which is explained by the presence of hypertension and diabetes. In the  
20  
21 random sample, however, ACR was generally low for all headache and headache-free groups.  
22  
23  
24  
25  
26  
27

28 The unadjusted analysis indicated an association between ACR and headache status in the  
29  
30 morbid-, random and combined samples. However, when adjusting for age and sex the  
31  
32 association disappeared, suggesting these variables to be the major contributing factors for  
33  
34 differences in ACR in the present study. Given the fact that women have less muscular mass  
35  
36 and lower creatinine excretion than men, and that creatinine excretion decreases with age,<sup>25</sup> a  
37  
38 confounding effect of age and sex on ACR was not unexpected.  
39  
40  
41  
42  
43  
44

45 Contrary to our hypothesis we did not find urine albumin leakage to be more prominent  
46  
47 among migraine sufferers than among headache-free subjects. If endothelial dysfunction with  
48  
49 albumin leakage was a feature of migraine, we would expect elevated ACR levels among  
50  
51 migraine subjects, and highest among MA. Although we could not find an association  
52  
53 between ACR and migraine status, there was a non-significant tendency in the opposite  
54  
55 direction; subjects with MA had the lowest ACR levels. While many previous studies favor  
56  
57  
58  
59  
60

1  
2  
3 the presence of endothelial dysfunction in migraine patients, some studies argue against. In  
4  
5 fact, systemic endothelium-dependent vasodilation, nitric oxide levels and stimulated t-PA  
6  
7 levels have been found similarly expressed in migraine subjects and healthy controls.<sup>36-38</sup>  
8  
9 Furthermore, it was recently suggested that extracranial dilatation may not be relevant for  
10  
11 migraine pain during attacks.<sup>39</sup>  
12  
13

14  
15  
16  
17  
18 In summary, in this first study examining albumin leakage in migraine sufferers, we did not  
19  
20 find urine albumin leakage to be more prominent among migraine subjects than among  
21  
22 headache-free subjects, which could indicate that systemic endothelial dysfunction is not a  
23  
24 prominent feature of migraine.  
25  
26  
27  
28  
29  
30  
31  
32  
33  
34  
35  
36  
37  
38  
39  
40  
41  
42  
43  
44  
45  
46  
47  
48  
49  
50  
51  
52  
53  
54  
55  
56  
57  
58  
59  
60

**Contributors:**

LMJ contributed to the study design, data analysis, data interpretations and wrote the manuscript. BSW contributed to the data analysis, data interpretations and the drafting of the manuscript. SR and JH conceived the original study, provided laboratory resources and contributed to the manuscript. AHP contributed to the data analysis, data interpretations and the manuscript. JAZ contributed to the study design, data interpretations and the manuscript. All authors approved the final version of the manuscript.

**Funding:**

The present study was funded by South-Eastern Norway Regional Health Authority, which had no role in the design or conduct of the study. The Nord-Trøndelag Health Study (HUNT) is a collaboration between HUNT Research Centre, Faculty of Medicine, Norwegian University of Science and Technology (NTNU, Levanger), Norwegian Institute of Public Health and Nord-Trøndelag County Council.

**Competing interests:**

None

**Ethics approval:**

The Norwegian Data Inspectorate and the Regional Committee for Medical and Health Research Ethics approved the study.

1  
2  
3 **Provenance and peer review**  
4

5 Not commissioned; externally peer reviewed  
6  
7

8  
9 **Data sharing statement**  
10

11 No additional data are available.  
12  
13

14  
15  
16  
17  
18  
19  
20  
21  
22  
23  
24  
25  
26  
27  
28  
29  
30  
31  
32  
33  
34  
35  
36  
37  
38  
39  
40  
41  
42  
43  
44  
45  
46  
47  
48  
49  
50  
51  
52  
53  
54  
55  
56  
57  
58  
59  
60

For peer review only

## References

1. Stovner LJ and Andree C. Prevalence of headache in Europe: a review for the Eurolight project. *J Headache Pain* 2010;**11**(4):289-99.
2. Vos T, Flaxman AD, Naghavi M, *et al.* Years lived with disability (YLDs) for 1160 sequelae of 289 diseases and injuries 1990-2010: a systematic analysis for the Global Burden of Disease Study 2010. *Lancet* 2012;**380**(9859):2163-96.
3. Steiner TJ, Stovner LJ and Birbeck GL. Migraine: the seventh disabler. *Headache* 2013;**53**(2):227-9.
4. Andlin-Sobocki P, Jonsson B, Wittchen HU, *et al.* Cost of disorders of the brain in Europe. *Eur J Neurol* 2005;**12 Suppl 1**:1-27.
5. Headache Classification Subcommittee of the International Headache S. The International Classification of Headache Disorders: 2nd edition. *Cephalalgia* 2004;**24 Suppl 1**:9-160.
6. Lipton RB, Stewart WF, Diamond S, *et al.* Prevalence and burden of migraine in the United States: data from the American Migraine Study II. *Headache* 2001;**41**(7):646-57.
7. Schurks M, Rist PM, Bigal ME, *et al.* Migraine and cardiovascular disease: systematic review and meta-analysis. *BMJ* 2009;**339**:b3914.
8. Kruit MC, van Buchem MA, Hofman PA, *et al.* Migraine as a risk factor for subclinical brain lesions. *JAMA* 2004;**291**(4):427-34.
9. Gudmundsson LS, Scher AI, Aspelund T, *et al.* Migraine with aura and risk of cardiovascular and all cause mortality in men and women: prospective cohort study. *BMJ* 2010;**341**:c3966.
10. Bigal ME, Kurth T, Hu H, *et al.* Migraine and cardiovascular disease: possible mechanisms of interaction. *Neurology* 2009;**72**(21):1864-71.
11. Cai H and Harrison DG. Endothelial dysfunction in cardiovascular diseases: the role of oxidant stress. *Circ Res* 2000;**87**(10):840-4.
12. Schwedt TJ. Endothelial dysfunction in migraine. *Cephalalgia* 2009;**29**(9):997-1002.
13. Yetkin E, Ozisik H, Ozcan C, *et al.* Increased dilator response to nitrate and decreased flow-mediated dilatation in migraineurs. *Headache* 2007;**47**(1):104-10.
14. Lee ST, Chu K, Jung KH, *et al.* Decreased number and function of endothelial progenitor cells in patients with migraine. *Neurology* 2008;**70**(17):1510-7.
15. Gallai V, Sarchielli P, Firenze C, *et al.* Endothelin 1 in migraine and tension-type headache. *Acta Neurol Scand* 1994;**89**(1):47-55.
16. Tietjen GE, Herial NA, White L, *et al.* Migraine and biomarkers of endothelial activation in young women. *Stroke* 2009;**40**(9):2977-82.
17. Dreier JP, Kleeberg J, Petzold G, *et al.* Endothelin-1 potently induces Leao's cortical spreading depression in vivo in the rat: a model for an endothelial trigger of migrainous aura? *Brain* 2002;**125**(Pt 1):102-12.
18. Tietjen GE, Al-Qasbi MM, Athanas K, *et al.* Increased von Willebrand factor in migraine. *Neurology* 2001;**57**(2):334-6.
19. Malik A, Sultan S, Turner S, *et al.* Urinary albumin excretion is associated with impaired flow- and nitroglycerin-mediated brachial artery dilatation in hypertensive adults. *J Hum Hypertens* 2007;**21**(3):231-38.
20. Pedrinelli R, Dell'Omo G, Penno G, *et al.* Non-diabetic microalbuminuria, endothelial dysfunction and cardiovascular disease. *Vasc Med* 2001;**6**(4):257-64.
21. Naidoo D. The link between microalbuminuria, endothelial dysfunction and cardiovascular disease in diabetes. *Cardiovasc J S Afr* 2002;**13**(4):194-9.
22. Holmen J, Midthjell K, Krüger Ø, *et al.* The Nord-Trøndelag Health Study 1995-97 (HUNT2): Objectives, contents, methods and participation. *Norsk Epidemiologi* 2003;**13**(1):19-32.
23. Hagen K, Zwart JA, Vatten L, *et al.* Head-HUNT: validity and reliability of a headache questionnaire in a large population-based study in Norway. *Cephalalgia* 2000;**20**(4):244-51.



- 1
  - 2
  - 3
  - 4
  - 5
  - 6
  - 7
  - 8
  - 9
  - 10
  - 11
  - 12
  - 13
  - 14
  - 15
  - 16
  - 17
  - 18
  - 19
  - 20
  - 21
  - 22
  - 23
  - 24
  - 25
  - 26
  - 27
  - 28
  - 29
  - 30
  - 31
  - 32
  - 33
  - 34
  - 35
  - 36
  - 37
  - 38
  - 39
  - 40
  - 41
  - 42
  - 43
  - 44
  - 45
  - 46
  - 47
  - 48
  - 49
  - 50
  - 51
  - 52
  - 53
  - 54
  - 55
  - 56
  - 57
  - 58
  - 59
  - 60
24. Headache Classification Committee of the International Headache Society. Classification and diagnostic criteria for headache disorders, cranial neuralgias and facial pain. *Cephalalgia* 1988;**8 Suppl 7**:1-96.
25. Hallan H, Romundstad S, Kvenild K, *et al.* Microalbuminuria in diabetic and hypertensive patients and the general population--consequences of various diagnostic criteria--the Nord-Trondelag Health Study (HUNT). *Scand J Urol Nephrol* 2003;**37**(2):151-8.
26. Jensen JS, Clausen P, Borch-Johnsen K, *et al.* Detecting microalbuminuria by urinary albumin/creatinine concentration ratio. *Nephrol Dial Transplant* 1997;**12 Suppl 2**:6-9.
27. Viberti GC, Hill RD, Jarrett RJ, *et al.* Microalbuminuria as a predictor of clinical nephropathy in insulin-dependent diabetes mellitus. *Lancet* 1982;**1**(8287):1430-2.
28. Diener HC and Kurth T. Is migraine a risk factor for stroke? *Neurology* 2005;**64**(9):1496-7.
29. Cerasola G, Cottone S, Mule G, *et al.* Microalbuminuria, renal dysfunction and cardiovascular complication in essential hypertension. *J Hypertens* 1996;**14**(7):915-20.
30. Kuritzky L, Toto R and Van Buren P. Identification and management of albuminuria in the primary care setting. *J Clin Hypertens (Greenwich)* 2011;**13**(6):438-49.
31. Perticone F, Maio R, Tripepi G, *et al.* Endothelial dysfunction and mild renal insufficiency in essential hypertension. *Circulation* 2004;**110**(7):821-5.
32. Pedrinelli R, Giampietro O, Carmassi F, *et al.* Microalbuminuria and endothelial dysfunction in essential hypertension. *Lancet* 1994;**344**(8914):14-8.
33. Romundstad S, Holmen J, Kvenild K, *et al.* Microalbuminuria and all-cause mortality in 2,089 apparently healthy individuals: a 4.4-year follow-up study. The Nord-Trondelag Health Study (HUNT), Norway. *Am J Kidney Dis* 2003;**42**(3):466-73.
34. Chronic Kidney Disease Prognosis C, Matsushita K, van der Velde M, *et al.* Association of estimated glomerular filtration rate and albuminuria with all-cause and cardiovascular mortality in general population cohorts: a collaborative meta-analysis. *Lancet* 2010;**375**(9731):2073-81.
35. Klausen K, Borch-Johnsen K, Feldt-Rasmussen B, *et al.* Very low levels of microalbuminuria are associated with increased risk of coronary heart disease and death independently of renal function, hypertension, and diabetes. *Circulation* 2004;**110**(1):32-5.
36. Vanmolkot FH and de Hoon JN. Endothelial function in migraine: a cross-sectional study. *BMC Neurol* 2010;**10**:119.
37. Silva FA, Rueda-Clausen CF, Silva SY, *et al.* Endothelial function in patients with migraine during the interictal period. *Headache* 2007;**47**(1):45-51.
38. Perko D, Pretnar-Oblak J, Sabovic M, *et al.* Endothelium-dependent vasodilatation in migraine patients. *Cephalalgia* 2011;**31**(6):654-60.
39. Amin FM, Asghar MS, Hougaard A, *et al.* Magnetic resonance angiography of intracranial and extracranial arteries in patients with spontaneous migraine without aura: a cross-sectional study. *Lancet Neurol* 2013;**12**(5):454-61.

Table 1: Clinical profile of the study participants

|                               | No headache | Non-migraine headache | Migraine    |
|-------------------------------|-------------|-----------------------|-------------|
| <b>Morbid sample (n=4748)</b> |             |                       |             |
| Women (%)                     | 51.7        | 60.2                  | 69.8        |
| Mean age (SD)                 | 67.0 (11.2) | 58.7 (12.9)           | 51.5 (12.5) |
| Antihypertensive use (%)      | 86.9        | 84.4                  | 83.0        |
| Diabetes (%)                  | 22.5        | 22.5                  | 20.9        |
| Daily smokers (%)             | 19.3        | 24.6                  | 23.1        |
| Mean Body-mass index (SD)     | 28.6 (4.5)  | 29.0 (4.9)            | 28.7 (4.8)  |
| <b>Random sample (n=1851)</b> |             |                       |             |
| Women (%)                     | 46.8        | 63.2                  | 75.0        |
| Mean age (SD)                 | 53.9 (16.5) | 43.6 (13.7)           | 39.6 (11.1) |
| Antihypertensive use (%)      | 13.1        | 7.2                   | 7.0         |
| Diabetes (%)                  | 4.1         | 1.2                   | 0.0         |
| Daily smokers (%)             | 27.3        | 33.3                  | 34.8        |
| Mean Body-mass index (SD)     | 26.5 (4.0)  | 26.1 (4.0)            | 25.8 (3.8)  |

SD: standard deviation.

Table 2. Albumin/Creatinine ratio by headache status and selection criterium

|                       | <b>Crude</b>                |                    | <b>Model I<sup>C</sup></b>  |                    | <b>Model II<sup>D</sup></b> |                    |
|-----------------------|-----------------------------|--------------------|-----------------------------|--------------------|-----------------------------|--------------------|
|                       | mean ACR<br>(95% CI)<br>N   | p-value            | mean ACR<br>(95% CI)<br>N   | p-value            | mean ACR<br>(95% CI)<br>N   | p-value            |
| <b>Morbid sample</b>  |                             | 0.013 <sup>A</sup> |                             | 0.13 <sup>A</sup>  |                             | 0.11 <sup>A</sup>  |
| No headache           | 2.03<br>(1.92-2.14)<br>3998 |                    | 1.96<br>(1.85-2.07)<br>3998 |                    | 1.96<br>(1.85-2.06)<br>3978 |                    |
| Non-migraine headache | 1.95<br>(1.68-2.23)<br>591  | 0.61 <sup>B</sup>  | 2.26<br>(1.97-2.54)<br>591  | 0.057 <sup>B</sup> | 2.27<br>(1.99-2.55)<br>585  | 0.044 <sup>B</sup> |
| Migraine              | 1.22<br>(0.68-1.75)<br>159  | 0.003 <sup>B</sup> | 1.85<br>(1.31-2.40)<br>159  | 0.70 <sup>B</sup>  | 1.87<br>(1.33-2.41)<br>158  | 0.75 <sup>B</sup>  |
| <b>Random sample</b>  |                             | 0.011 <sup>A</sup> |                             | 0.60 <sup>A</sup>  |                             | 0.55 <sup>A</sup>  |
| No headache           | 1.22<br>(1.11-1.32)<br>1289 |                    | 1.16<br>(1.06-1.27)<br>1289 |                    | 1.16<br>(1.05-1.26)<br>1285 |                    |
| Non-migraine headache | 0.96<br>(0.77-1.14)<br>418  | 0.017 <sup>B</sup> | 1.08<br>(0.89-1.26)<br>418  | 0.44 <sup>B</sup>  | 1.07<br>(0.89-1.26)<br>417  | 0.44 <sup>B</sup>  |
| Migraine              | 0.85<br>(0.53-1.16)<br>144  | 0.028 <sup>B</sup> | 1.02<br>(0.70-1.34)<br>144  | 0.41 <sup>B</sup>  | 1.00<br>(0.68-1.31)<br>143  | 0.35 <sup>B</sup>  |

<sup>A</sup>p-value for overall effect of headache groups.

<sup>B</sup>p-values are for comparison against no headache group within the same selection criterium.

<sup>C</sup>Model I: Adjusted for age and sex.

<sup>D</sup>Model II: Adjusted for age, sex, self-reported diabetes and self-reported use of antihypertensive medication.

Table 3: Albumin/Creatinine ratio by headache status in combined sample

|                       | <b>Crude</b>                |                     | <b>Model I<sup>C</sup></b>  |                   | <b>Model II<sup>D</sup></b> |                   |
|-----------------------|-----------------------------|---------------------|-----------------------------|-------------------|-----------------------------|-------------------|
|                       | mean ACR<br>(95% CI)<br>N   | p-value             | mean ACR<br>(95% CI)<br>N   | p-value           | mean ACR<br>(95% CI)<br>N   | p-value           |
|                       |                             | <0.001 <sup>A</sup> |                             | 0.29 <sup>A</sup> |                             | 0.23 <sup>A</sup> |
| No headache           | 1.83<br>(1.75-1.92)<br>5287 |                     | 1.73<br>(1.65-1.81)<br>5287 |                   | 1.73<br>(1.64-1.81)<br>5263 |                   |
| Non-migraine headache | 1.54<br>(1.35-1.73)<br>1009 | 0.007 <sup>B</sup>  | 1.89<br>(1.69-2.09)<br>1009 | 0.15              | 1.90<br>(1.71-2.09)<br>1002 | 0.11 <sup>B</sup> |
| Migraine              | 1.04<br>(0.69-1.39)<br>303  | <0.001 <sup>B</sup> | 1.67<br>(1.31-2.03)<br>303  | 0.74              | 1.66<br>(1.31-2.01)<br>301  | 0.72 <sup>B</sup> |

<sup>A</sup>p-value for overall effect of headache groups.

<sup>B</sup>p-values are for comparison against no headache group.

<sup>C</sup>Model I: Adjusted for age and sex.

<sup>D</sup>Model II: Adjusted for age, sex, self-reported diabetes and self-reported use of antihypertensive medication.

Table 4: Albumin/Creatinine ratio by migraine subtypes

|                          | <b>Crude</b>                |                     | <b>Model I<sup>C</sup></b>  |                   | <b>Model II<sup>D</sup></b> |                   |
|--------------------------|-----------------------------|---------------------|-----------------------------|-------------------|-----------------------------|-------------------|
|                          | mean ACR<br>(95% CI)<br>N   | p-value             | mean ACR<br>(95% CI)<br>N   | p-value           | mean ACR<br>(95% CI)<br>N   | p-value           |
|                          |                             | <0.001 <sup>A</sup> |                             | 0.78 <sup>A</sup> |                             | 0.68 <sup>A</sup> |
| No headache              | 1.83<br>(1.75-1.92)<br>5287 |                     | 1.73<br>(1.65-1.81)<br>5287 |                   | 1.73<br>(1.64-1.81)<br>5263 |                   |
| Migraine without<br>aura | 1.05<br>(0.66-1.44)<br>244  | <0.001 <sup>B</sup> | 1.73<br>(1.33-2.12)<br>244  | 0.88 <sup>B</sup> | 1.73<br>(1.34-2.13)<br>242  | 0.85 <sup>B</sup> |
| Migraine with<br>aura    | 1.00<br>(0.21-1.80)<br>59   | 0.042 <sup>B</sup>  | 1.43<br>(0.64-2.22)<br>59   | 0.49 <sup>B</sup> | 1.36<br>(0.59-2.13)<br>59   | 0.39 <sup>B</sup> |

<sup>A</sup>p-value for overall effect of headache groups.

<sup>B</sup>p-values are for comparison against controls.

<sup>C</sup>Model I: Adjusted for age and sex.

<sup>D</sup>Model II: Adjusted for age, sex, self-reported diabetes and self-reported use of antihypertensive medication.

**Title page****Title**

Urinary albumin excretion as a marker of endothelial dysfunction in **migraine sufferers**; the HUNT study, Norway

**Authors**

Line Melå Jacobsen<sup>a</sup>, Bendik S Winsvold<sup>ab</sup>, Solfrid Romundstad<sup>cd</sup>, Are Hugo Pripp<sup>e</sup>, Jostein Holmen<sup>f</sup>, John-Anker Zwart<sup>abg</sup>

**Affiliations**

a: FORMI, Oslo University Hospital, Oslo, Norway

b: Department of Neurology, Oslo University Hospital, Oslo, Norway

c: Department of Cancer Research and Molecular Medicine, Norwegian University of Science and Technology, Trondheim, Norway

d: Department of Internal Medicine, Levanger Hospital, Health Trust Nord-Trøndelag, Levanger, Norway

e: Department of Biostatistics, Epidemiology & Health Economy, Oslo University Hospital, Oslo, Norway

f: HUNT Research Centre, Department of Public Health and General Practice, Norwegian University of Science and Technology, Levanger, Norway

g: Faculty of Medicine, University of Oslo, Norway

**Corresponding author:**

Line Melå Jacobsen

E-mail: [linemjaco@gmail.com](mailto:linemjaco@gmail.com)

Telephone / Fax: +47 23079022 / +47 23016150

Postal address: FORMI, Oslo University Hospital, Building 37 B, PB 4956 Nydalen, 0424 Oslo, Norway

**Key words**

Migraine; headache; endothelial dysfunction; albuminuria

**Word count**

**2671** words

## Abstract

**Objective:** To investigate urine albumin leakage as a marker of endothelial dysfunction in migraine subjects.

**Design:** A population-based health study

**Participants:** 303 subjects with migraine, 1009 subjects with non-migraine headache and 5287 headache free controls.

**Outcomes:** The association between urine albumin to creatinine ratio (ACR) and headache status was investigated in the Nord-Trøndelag Health Study (HUNT-2). Subjects were selected in two strata, based on either 1) self-reported hypertension/diabetes (morbid sample) or 2) a random sample. Analyses were performed using analysis of covariance.

**Results:** There was no association between headache status and ACR in the study population ( $p=0.23$ , mean ACR for migraine 1.66, 95% CI 1.31-2.01, for non-migraine headache 1.90, 95% CI 1.71-2.09 and for no headache 1.73, 95% CI 1.64-1.81) after relevant adjustments. Similarly, no association between headache status and ACR was seen when the analysis was stratified for morbid and random samples, or for migraine with and without aura.

**Conclusions:** We found no evidence of increased urine albumin leakage in migraine sufferers when compared to headache free controls. This could indicate that systemic endothelial dysfunction is not a prominent feature of migraine.

## Article summary

### Article focus:

- We aimed to investigate urine albumin to creatinine ratio (ACR) as a marker of endothelial dysfunction in subjects with migraine, non-migraine headache and headache free controls.

### Key messages:

- No associations were found between headache status and ACR, implying the absence of large differences in urine albumin leakage between **migraine subjects** or other headache sufferers and headache free controls.
- This may indicate that **systemic** endothelial dysfunction is not a prominent feature of migraine.

### Strengths and limitations of this study:

- The study is the first to assess albumin leakage as a marker of endothelial dysfunction in **migraine subjects**.
- The study includes a relatively large sample size, objective measurements of albumin leakage and the use of validated headache diagnoses.
- The sample size might be too low to detect ACR differences among migraine subtypes. In particular, there was a limited number of **subjects having migraine** with aura in this study.



## Introduction

Migraine is a common disabling headache disorder affecting 6-7% of men and 18% of women.<sup>1</sup> It is rated as one of the top 10 most disabling diseases<sup>2,3</sup> and has been estimated to be the most costly neurological disorder to society.<sup>4</sup> Migraine manifests in headache attacks lasting 4-72 hours characterized by throbbing, pulsating and unilateral headache, often accompanied by nausea and photo- and phonophobia.<sup>5</sup> In up to a third of the patients<sup>6</sup> these attacks may be accompanied by additional neurological aura symptoms separating the disease into migraine with aura (MA) and migraine without aura (MO).<sup>5</sup>

Migraine, in particular MA, has been associated with an increased risk of cardiovascular disease (CVD) including ischemic stroke, ischemic lesions of the brain, myocardial infarction, angina and cardiovascular death.<sup>7-9</sup> While the mechanisms underlying this link remain unknown, multiple explanations have been suggested. Shared environmental- or genetic risk factors could be present, changes in vascular function might contribute to migraine pathophysiology or the opposite; migraine pathophysiology could induce changes in vascular function, or mutual mechanistic pathways may exist.<sup>10</sup>

The vascular endothelium plays an important role in setting vascular tone, regulating vascular permeability, maintaining trombotic balance and regulating fibrinolytic- and inflammatory pathways. A dysfunctional vascular endothelium is often observed in CVD.<sup>11</sup> Interestingly, abnormal control of systemic vascular tone,<sup>12</sup> alterations in systemic arterial structure and function<sup>13</sup> and impaired ability to repair systemic endothelial injury<sup>14</sup> have also been reported in migraine patients. The increase of systemic vasoactive mediators during migraine attacks, including the vasoconstrictive factor ET-1 and the pro-inflammatory factor C-reactive protein

1  
2  
3 (CRP), suggests an involvement of the endothelium in migraine headache.<sup>15,16</sup> Endothelial  
4  
5 dysfunction could also be implicated in the generation of migraine aura as ET-1 has been  
6  
7 shown to produce cortical spreading depression (CSD), the presumed substrate of migraine  
8  
9 aura, in rats.<sup>17</sup> Furthermore, **migraine patients** with aura have an increased risk of thrombotic  
10  
11 events. It has been reported raised plasma levels of vWf in migraine patients,<sup>18</sup> a factor that  
12  
13 promotes clotting and formation when the endothelium is damaged, further supporting the  
14  
15 presence of endothelial dysfunction in migraine. This could explain the link between migraine  
16  
17 and CVD and might elucidate pathophysiological mechanisms of migraine.  
18  
19

20  
21  
22  
23  
24 The presence of subclinical increases in urinary albumin excretion (UAE) **has been associated**  
25  
26 **with impaired endothelium-dependent vasodilatation<sup>19</sup> and is believed to reflect endothelial**  
27  
28 **dysfunction.<sup>20,21</sup>** No previous studies have, however, investigated albumin excretion in  
29  
30 **migraine subjects.** The aim of this study was therefore to compare urine albumin to creatinine  
31  
32 ratio (ACR), as a measure of UAE, in subjects with migraine, non-migraine headache and  
33  
34 headache-free controls.  
35  
36  
37  
38  
39  
40  
41  
42  
43  
44  
45  
46  
47  
48  
49  
50  
51  
52  
53  
54  
55  
56  
57  
58  
59  
60

## Methods

### Subjects and headache diagnoses

Subjects were selected from the second Nord-Trøndelag Health Study (HUNT 2), a general health survey conducted in 1995-1997. All inhabitants aged  $\geq 20$  years residing in the county at the time of screening were invited ( $n = 92,703$ ) and 65,258 subjects (70.4%) participated.

<sup>22</sup>. The population in Nord-Trøndelag County is ethnically homogenous with less than 3% non-Caucasians. All participants were mailed a questionnaire and attended a clinical examination, for details see.<sup>22</sup> The questionnaire included questions on previous or current CVD, hypertension, diabetes mellitus and smoking habits as well as 13 headache questions.

The clinical examination included measurements of height, weight and blood pressure. When attending the health examination, participants received a second questionnaire to complete and return by mail. The 13 headache questions of the questionnaire were designed mainly to

determine whether the individual had headache, the frequency of headache, and to diagnose migraine according to a modified version of the ICHD migraine criteria.<sup>23,24</sup> Subjects who

answered "yes" to the question "Have you suffered from headache during the last 12 months?" were classified as headache sufferers. Those who answered "no" comprised the

headache free control group. Based on the subsequent 12 headache questions headache sufferers were classified as having migraine if they fulfilled the following three criteria: 1)

Headache attacks lasting 4 to 72 hours (less than 4 hours was accepted for those who reported often visual disturbances before headache). 2) Headache with at least one of the following

characteristics: pulsating quality, unilateral location, aggravation by physical activity. 3) During headache, at least one of the following: nausea, photophobia or phonophobia. Those

within this group who reported often having visual disturbance prior to headache were classified as having MA. Headache sufferers who did not fulfil the criteria for migraine and

did not have self-reported migraine were classified as having non-migraine headache.

1  
2  
3 Headache diagnoses were mutually exclusive. The headache diagnoses were validated by  
4  
5 clinical interviews by physicians with long clinical experience in headache disorders. The  
6  
7 positive and negative predictive values of the questionnaire-based diagnoses were,  
8  
9 respectively 68% and 76% for non-migraine headache, 87% and 75% for migraine, and 100%  
10  
11 and 91% for MA. A total of 9,598 participants were included in a further study in which they  
12  
13 donated three urine samples for the determination of ACR, originally designed for  
14  
15 investigating UAE in hypertension and diabetes. Subjects were included based on 1) the  
16  
17 presence of self-reported diabetes mellitus and/or medically treated hypertension (morbid  
18  
19 sample) and 2) a 5% randomly selected sample of the total population (random sample).  
20  
21 Participants who contributed with information regarding both headache status and ACR were  
22  
23 eligible for the present study. Subjects with overt proteinuria,  $ACR \geq 25\text{mg}/\text{mmol}$  in men and  
24  
25  $\geq 35\text{mg}/\text{mmol}$  in women, one subject with migraine (with aura), 16 subjects with non-  
26  
27 migraine headache and 141 subjects without headache, were excluded. In total, 303 subjects  
28  
29 with migraine, 1009 subjects with non-migraine headache and 5287 headache free subjects  
30  
31 were included in the study, in which the morbid sample constituted 3688 medically treated  
32  
33 hypertensive subjects, 647 diabetic subjects and 413 subjects with both medically treated  
34  
35 hypertension and diabetes mellitus.

#### Urine sampling

46  
47 Participants received a unit with three plastic receptacles for three first morning urine  
48  
49 samples, three transport tubes and one envelope for returning the samples by mail to the  
50  
51 laboratory. Out of 11661 packs handed out, 9598 (82.3%) participants mailed three samples  
52  
53 back to the laboratory.<sup>25</sup> Those who failed to return three samples were excluded. A written  
54  
55 instruction describing how to collect urine, information about the screening and a  
56  
57  
58  
59  
60

1  
2  
3 questionnaire concerning urinary tract infection in the previous week, persistent hematuria in  
4  
5 the last year and menstruation at the time of collection was included. While the most  
6  
7 consistent method for determining UAE is 24-h urine sampling, it has been shown that  
8  
9 measuring ACR in one or more morning spot urine samples provides good specificity and  
10  
11 sensitivity.<sup>26</sup>  
12

### 13 14 15 16 17 18 Laboratory procedures

19  
20 Fresh, non-frozen urine samples were analyzed at the Central Laboratory at Levanger  
21  
22 Hospital on a Hitachi 91 Autoanalyzer (Hitachi, Mito, Japan). Urine albumin and creatinine  
23  
24 levels were determined using an immunoturbimetric method (antihuman serum albumin;  
25  
26 Dako Norway, Oslo) and Jaffé method, respectively. The ACR, measured in mg/mmol, was  
27  
28 used as an expression of UAE.  
29  
30  
31  
32  
33  
34

### 35 36 Consent

37  
38 Participation in HUNT2 was voluntary and each participant signed a written consent. All  
39  
40 surveys and analyses were approved by the Norwegian Data Inspectorate and by the Regional  
41  
42 Committee for Medical and Health Research Ethics.  
43  
44  
45  
46  
47  
48

### 49 50 Statistical analysis

51  
52 For all analyses we used mean ACR from three delivered urine samples, measured in  
53  
54 mg/mmol. Comparisons of mean ACR between cases with migraine, non-migraine headache  
55  
56 and headache free controls in the morbid, random and combined samples were performed by  
57  
58  
59  
60

1  
2  
3 analysis of covariance (ANCOVA). The confounding effect of potential confounders, i.e. age,  
4  
5 sex, body mass index (BMI), smoking, self-reported diabetes and self-reported  
6  
7 antihypertensive medication, in the combined sample was calculated by the formula [Mean  
8  
9  $ACR_{crude} - \text{Mean } ACR_{adj}$ ]/Mean  $ACR_{crude}$ , where Mean  $ACR_{crude}$  was the mean ACR in the  
10  
11 crude model and Mean  $ACR_{adj}$  was the mean ACR in the model adjusted for the relevant  
12  
13 variable. Variables with a confounding effect > 5% in one or more headache group were  
14  
15 included in the final model. A *p*-value less than 0.05 was used to indicate statistical  
16  
17  
18  
19  
20  
21  
22  
23  
24  
25  
26  
27  
28  
29  
30  
31  
32  
33  
34  
35  
36  
37  
38  
39  
40  
41  
42  
43  
44  
45  
46  
47  
48  
49  
50  
51  
52  
53  
54  
55  
56  
57  
58  
59  
60

## Results

Baseline characteristics for the random and morbid samples are shown in table 1. The morbid sample was characterized by a higher age and BMI and a lower proportion of smokers compared to the random sample. For both samples a higher proportion of women had headache than men, with the highest percentage of women found among the migraine subjects. Mean age was lower in the headache groups than in controls.

Crude analyses indicated an association between ACR and headache status in the morbid sample ( $p=0.013$ , mean ACR for migraine 1.22, for non-migraine headache 1.95 and for no headache 2.03) and the random sample ( $p=0.011$ , mean ACR for migraine 0.85, for non-migraine headache 0.96 and for no headache 1.22), table 2. However, when adjusting for age and sex this effect disappeared (Model I). No significant associations were observed between headache status and ACR in the morbid sample ( $p=0.11$ , mean ACR for migraine 1.87, for non-migraine headache 2.27 and for no headache 1.96) or the random sample ( $p=0.55$ , mean ACR for migraine 1.00, for non-migraine headache 1.07 and for no headache 1.16) when adjusted for age, sex, self-reported diabetes and self-reported use of antihypertensive medication (Model II).

A similar pattern was observed when morbid and random samples were combined; crude data indicated an association between ACR and headache status, but this effect was explained by differences in age and sex, table 3. No significant associations were observed when adjusted for age, sex, self-reported diabetes and self-reported use of antihypertensive medication ( $p=0.23$ , mean ACR for migraine 1.66, for non-migraine headache 1.90 and for no headache 1.73). Mean differences for ACR in the combined sample (Model II) were -0.07 (95% CI -0.43-0.30) between migraine subjects and headache-free controls and 0.18 (95% CI -0.04-

1  
2  
3 0.39) between non-migraine headache and headache free controls. We also examined the  
4  
5 association between headache status and ACR after stratification of migraine into its two  
6  
7 subtype's MA and MO. In the adjusted model, no differences in ACR scores were found  
8  
9 between either migraine subtype and controls ( $p=0.68$ , mean ACR for MA 1.36, for MO 1.73  
10  
11 and for no headache 1.73), table 4. There was no interaction between headache status and  
12  
13 self-reported diabetes, or between headache status and self-reported use of antihypertensive  
14  
15 medication on ACR. Since the measurement ACR was positively skewed, we repeated the  
16  
17 analyses after square root transformation, which provided similar results. To ease  
18  
19 interpretation only non-transformed results are presented.  
20  
21  
22  
23  
24  
25  
26  
27  
28  
29  
30  
31  
32  
33  
34  
35  
36  
37  
38  
39  
40  
41  
42  
43  
44  
45  
46  
47  
48  
49  
50  
51  
52  
53  
54  
55  
56  
57  
58  
59  
60



## Discussion

The present study did not find an association between headache status and ACR, indicating the absence of large differences in urine albumin leakage between migraine subjects or other headache sufferers and headache free controls. The mechanisms linking migraine and cardiovascular disease are likely complex, but dysregulation of vascular endothelium as expressed by albumin leakage is not supported by the present data to be a major factor.

The study includes a relatively large sample size, objective measurements of UAE, analyses based on fresh urine samples and the use of validated headache diagnoses. Furthermore, the design of the study allowed us to evaluate the association between headache status and UAE in a random sample as well as a morbid sample, which included a high proportion of subjects with hypertension and diabetes type I and II, well known risk factors for increased UAE.<sup>27-29</sup> A limitation of the study is, however, that hypertension- and diabetes information was based on self-report. Data on subjects' migraine status (ictal or interictal phase) during urine sampling was not available and it cannot be excluded that there may be a difference in urine albumin leakage during and outside a migraine attack. In addition, the sample size might be too low to detect ACR differences among migraine subtypes. In particular, there was a limited number of subjects having migraine with aura in this study.

A high level of urine ACR, most likely representing excessive glomerular capillary leakage of albumin,<sup>19</sup> is a risk marker for cardiovascular morbidity and mortality<sup>30</sup> and is believed to reflect endothelial dysfunction.<sup>19,21</sup> Increased UAE has been associated with impaired endothelium-dependent vasodilatation<sup>19</sup>, impaired peripheral vasoreactivity to endothelial agonists<sup>31</sup> as well as with circulating biomarkers of endothelial dysfunction.<sup>32</sup> Abnormal ACR

1  
2  
3 **levels** in urine have also been reported in inflammatory, non-cardiovascular conditions such  
4  
5 as rheumatoid arthritis, inflammatory bowel syndrome and surgery, which has been  
6  
7 hypothesized to be a result of circulating inflammatory molecules damaging parenchymal  
8  
9 functions of the kidneys.<sup>20</sup> Interestingly, ACR levels even within the normal range have been  
10  
11 associated with an increased rate of kidney disease, cardiovascular disease and mortality.<sup>33-35</sup>  
12  
13 As UAE is a biological continuum, we used continuous ACR values in the present study  
14  
15 rather than applying microalbuminuria commonly defined as  $ACR \geq 2.5\text{mg}/\text{mmol}$ . Mean  
16  
17 ACR levels in the morbid group of the present study were twice as high as for the randomly  
18  
19 chosen sample, which is explained by the presence of hypertension and diabetes. In the  
20  
21 random sample, however, ACR was generally low for all headache and headache-free groups.  
22  
23  
24  
25  
26  
27

28 The unadjusted analysis indicated an association between ACR and headache status in the  
29  
30 morbid-, random and combined samples. However, when adjusting for age and sex the  
31  
32 association disappeared, suggesting these variables to be the major contributing factors for  
33  
34 differences in ACR in the present study. Given the fact that women have less muscular mass  
35  
36 and lower creatinine excretion than men, and that creatinine excretion decreases with age,<sup>25</sup> a  
37  
38 confounding effect of age and sex on ACR was not unexpected.  
39  
40  
41  
42  
43  
44

45 Contrary to our hypothesis we did not find urine albumin leakage to be more prominent  
46  
47 among **migraine sufferers** than among headache-free subjects. If endothelial dysfunction with  
48  
49 albumin leakage was a feature of migraine, we would expect elevated ACR levels among  
50  
51 **migraine subjects**, and highest among MA. Although we could not find an association  
52  
53 between ACR and migraine status, there was a non-significant tendency in the opposite  
54  
55 direction; subjects with MA had the lowest ACR levels. While many previous studies favor  
56  
57  
58  
59  
60

1  
2  
3 the presence of endothelial dysfunction in **migraine patients**, some studies argue against. In  
4 fact, **systemic** endothelium-dependent vasodilation, nitric oxide levels and stimulated t-PA  
5 levels have been found similarly expressed in **migraine subjects** and healthy controls.<sup>36-38</sup>  
6  
7 Furthermore, it was recently suggested that extracranial dilatation may not be relevant for  
8 migraine pain during attacks.<sup>39</sup>  
9  
10  
11  
12  
13

14  
15  
16  
17  
18 In summary, in this first study examining albumin leakage in **migraine sufferers**, we did not  
19 find urine albumin leakage to be more prominent among **migraine subjects** than among  
20 headache-free subjects, which could indicate that **systemic** endothelial dysfunction is not a  
21 prominent feature of migraine.  
22  
23  
24  
25  
26  
27  
28  
29  
30  
31  
32  
33  
34  
35  
36  
37  
38  
39  
40  
41  
42  
43  
44  
45  
46  
47  
48  
49  
50  
51  
52  
53  
54  
55  
56  
57  
58  
59  
60

**Contributors:**

LMJ contributed to the study design, data analysis, data interpretations and wrote the manuscript. BSW contributed to the data analysis, data interpretations and the drafting of the manuscript. SR and JH conceived the original study, provided laboratory resources and contributed to the manuscript. AHP contributed to the data analysis, data interpretations and the manuscript. JAZ contributed to the study design, data interpretations and the manuscript. All authors approved the final version of the manuscript.

**Funding:**

The present study was funded by South-Eastern Norway Regional Health Authority, which had no role in the design or conduct of the study. The Nord-Trøndelag Health Study (HUNT) is a collaboration between HUNT Research Centre, Faculty of Medicine, Norwegian University of Science and Technology (NTNU, Levanger), Norwegian Institute of Public Health and Nord-Trøndelag County Council.

**Competing interests:**

None

**Ethics approval:**

The Norwegian Data Inspectorate and the Regional Committee for Medical and Health Research Ethics approved the study.

1  
2  
3 **Provenance and peer review**  
4

5 Not commissioned; externally peer reviewed  
6  
7

8  
9 **Data sharing statement**  
10

11 No additional data are available.  
12  
13

14  
15  
16  
17  
18  
19  
20  
21  
22  
23  
24  
25  
26  
27  
28  
29  
30  
31  
32  
33  
34  
35  
36  
37  
38  
39  
40  
41  
42  
43  
44  
45  
46  
47  
48  
49  
50  
51  
52  
53  
54  
55  
56  
57  
58  
59  
60

For peer review only

## References

1. Stovner LJ and Andree C. Prevalence of headache in Europe: a review for the Eurolight project. *J Headache Pain* 2010;**11**(4):289-99.
2. Vos T, Flaxman AD, Naghavi M, *et al*. Years lived with disability (YLDs) for 1160 sequelae of 289 diseases and injuries 1990-2010: a systematic analysis for the Global Burden of Disease Study 2010. *Lancet* 2012;**380**(9859):2163-96.
3. Steiner TJ, Stovner LJ and Birbeck GL. Migraine: the seventh disabler. *Headache* 2013;**53**(2):227-9.
4. Andlin-Sobocki P, Jonsson B, Wittchen HU, *et al*. Cost of disorders of the brain in Europe. *Eur J Neurol* 2005;**12 Suppl 1**:1-27.
5. Headache Classification Subcommittee of the International Headache S. The International Classification of Headache Disorders: 2nd edition. *Cephalalgia* 2004;**24 Suppl 1**:9-160.
6. Lipton RB, Stewart WF, Diamond S, *et al*. Prevalence and burden of migraine in the United States: data from the American Migraine Study II. *Headache* 2001;**41**(7):646-57.
7. Schurks M, Rist PM, Bigal ME, *et al*. Migraine and cardiovascular disease: systematic review and meta-analysis. *BMJ* 2009;**339**:b3914.
8. Kruit MC, van Buchem MA, Hofman PA, *et al*. Migraine as a risk factor for subclinical brain lesions. *JAMA* 2004;**291**(4):427-34.
9. Gudmundsson LS, Scher AI, Aspelund T, *et al*. Migraine with aura and risk of cardiovascular and all cause mortality in men and women: prospective cohort study. *BMJ* 2010;**341**:c3966.
10. Bigal ME, Kurth T, Hu H, *et al*. Migraine and cardiovascular disease: possible mechanisms of interaction. *Neurology* 2009;**72**(21):1864-71.
11. Cai H and Harrison DG. Endothelial dysfunction in cardiovascular diseases: the role of oxidant stress. *Circ Res* 2000;**87**(10):840-4.
12. Schwedt TJ. Endothelial dysfunction in migraine. *Cephalalgia* 2009;**29**(9):997-1002.
13. Yetkin E, Ozisik H, Ozcan C, *et al*. Increased dilator response to nitrate and decreased flow-mediated dilatation in migraineurs. *Headache* 2007;**47**(1):104-10.
14. Lee ST, Chu K, Jung KH, *et al*. Decreased number and function of endothelial progenitor cells in patients with migraine. *Neurology* 2008;**70**(17):1510-7.
15. Gallai V, Sarchielli P, Firenze C, *et al*. Endothelin 1 in migraine and tension-type headache. *Acta Neurol Scand* 1994;**89**(1):47-55.
16. Tietjen GE, Herial NA, White L, *et al*. Migraine and biomarkers of endothelial activation in young women. *Stroke* 2009;**40**(9):2977-82.
17. Dreier JP, Kleeberg J, Petzold G, *et al*. Endothelin-1 potently induces Leao's cortical spreading depression in vivo in the rat: a model for an endothelial trigger of migrainous aura? *Brain* 2002;**125**(Pt 1):102-12.
18. Tietjen GE, Al-Qasbi MM, Athanas K, *et al*. Increased von Willebrand factor in migraine. *Neurology* 2001;**57**(2):334-6.
19. Malik A, Sultan S, Turner S, *et al*. Urinary albumin excretion is associated with impaired flow- and nitroglycerin-mediated brachial artery dilatation in hypertensive adults. *J Hum Hypertens* 2007;**21**(3):231-38.
20. Pedrinelli R, Dell'Omo G, Penno G, *et al*. Non-diabetic microalbuminuria, endothelial dysfunction and cardiovascular disease. *Vasc Med* 2001;**6**(4):257-64.
21. Naidoo D. The link between microalbuminuria, endothelial dysfunction and cardiovascular disease in diabetes. *Cardiovasc J S Afr* 2002;**13**(4):194-9.
22. Holmen J, Midthjell K, Krüger Ø, *et al*. The Nord-Trøndelag Health Study 1995-97 (HUNT2): Objectives, contents, methods and participation. *Norsk Epidemiologi* 2003;**13**(1):19-32.
23. Hagen K, Zwart JA, Vatten L, *et al*. Head-HUNT: validity and reliability of a headache questionnaire in a large population-based study in Norway. *Cephalalgia* 2000;**20**(4):244-51.

- 1
  - 2
  - 3
  - 4
  - 5
  - 6
  - 7
  - 8
  - 9
  - 10
  - 11
  - 12
  - 13
  - 14
  - 15
  - 16
  - 17
  - 18
  - 19
  - 20
  - 21
  - 22
  - 23
  - 24
  - 25
  - 26
  - 27
  - 28
  - 29
  - 30
  - 31
  - 32
  - 33
  - 34
  - 35
  - 36
  - 37
  - 38
  - 39
  - 40
  - 41
  - 42
  - 43
  - 44
  - 45
  - 46
  - 47
  - 48
  - 49
  - 50
  - 51
  - 52
  - 53
  - 54
  - 55
  - 56
  - 57
  - 58
  - 59
  - 60
24. Headache Classification Committee of the International Headache Society. Classification and diagnostic criteria for headache disorders, cranial neuralgias and facial pain. *Cephalalgia* 1988;**8 Suppl 7**:1-96.
25. Hallan H, Romundstad S, Kvenild K, *et al.* Microalbuminuria in diabetic and hypertensive patients and the general population--consequences of various diagnostic criteria--the Nord-Trondelag Health Study (HUNT). *Scand J Urol Nephrol* 2003;**37**(2):151-8.
26. Jensen JS, Clausen P, Borch-Johnsen K, *et al.* Detecting microalbuminuria by urinary albumin/creatinine concentration ratio. *Nephrol Dial Transplant* 1997;**12 Suppl 2**:6-9.
27. Viberti GC, Hill RD, Jarrett RJ, *et al.* Microalbuminuria as a predictor of clinical nephropathy in insulin-dependent diabetes mellitus. *Lancet* 1982;**1**(8287):1430-2.
28. Diener HC and Kurth T. Is migraine a risk factor for stroke? *Neurology* 2005;**64**(9):1496-7.
29. Cerasola G, Cottone S, Mule G, *et al.* Microalbuminuria, renal dysfunction and cardiovascular complication in essential hypertension. *J Hypertens* 1996;**14**(7):915-20.
30. Kuritzky L, Toto R and Van Buren P. Identification and management of albuminuria in the primary care setting. *J Clin Hypertens (Greenwich)* 2011;**13**(6):438-49.
31. Perticone F, Maio R, Tripepi G, *et al.* Endothelial dysfunction and mild renal insufficiency in essential hypertension. *Circulation* 2004;**110**(7):821-5.
32. Pedrinelli R, Giampietro O, Carmassi F, *et al.* Microalbuminuria and endothelial dysfunction in essential hypertension. *Lancet* 1994;**344**(8914):14-8.
33. Romundstad S, Holmen J, Kvenild K, *et al.* Microalbuminuria and all-cause mortality in 2,089 apparently healthy individuals: a 4.4-year follow-up study. The Nord-Trondelag Health Study (HUNT), Norway. *Am J Kidney Dis* 2003;**42**(3):466-73.
34. Chronic Kidney Disease Prognosis C, Matsushita K, van der Velde M, *et al.* Association of estimated glomerular filtration rate and albuminuria with all-cause and cardiovascular mortality in general population cohorts: a collaborative meta-analysis. *Lancet* 2010;**375**(9731):2073-81.
35. Klausen K, Borch-Johnsen K, Feldt-Rasmussen B, *et al.* Very low levels of microalbuminuria are associated with increased risk of coronary heart disease and death independently of renal function, hypertension, and diabetes. *Circulation* 2004;**110**(1):32-5.
36. Vanmolkot FH and de Hoon JN. Endothelial function in migraine: a cross-sectional study. *BMC Neurol* 2010;**10**:119.
37. Silva FA, Rueda-Clausen CF, Silva SY, *et al.* Endothelial function in patients with migraine during the interictal period. *Headache* 2007;**47**(1):45-51.
38. Perko D, Pretnar-Oblak J, Sabovic M, *et al.* Endothelium-dependent vasodilatation in migraine patients. *Cephalalgia* 2011;**31**(6):654-60.
39. Amin FM, Asghar MS, Hougaard A, *et al.* Magnetic resonance angiography of intracranial and extracranial arteries in patients with spontaneous migraine without aura: a cross-sectional study. *Lancet Neurol* 2013;**12**(5):454-61.

Table 1: Clinical profile of the study participants

|                               | No headache | Non-migraine headache | Migraine    |
|-------------------------------|-------------|-----------------------|-------------|
| <b>Morbid sample (n=4748)</b> |             |                       |             |
| Women (%)                     | 51.7        | 60.2                  | 69.8        |
| Mean age (SD)                 | 67.0 (11.2) | 58.7 (12.9)           | 51.5 (12.5) |
| Antihypertensive use (%)      | 86.9        | 84.4                  | 83.0        |
| Diabetes (%)                  | 22.5        | 22.5                  | 20.9        |
| Daily smokers (%)             | 19.3        | 24.6                  | 23.1        |
| Mean Body-mass index (SD)     | 28.6 (4.5)  | 29.0 (4.9)            | 28.7 (4.8)  |
| <b>Random sample (n=1851)</b> |             |                       |             |
| Women (%)                     | 46.8        | 63.2                  | 75.0        |
| Mean age (SD)                 | 53.9 (16.5) | 43.6 (13.7)           | 39.6 (11.1) |
| Antihypertensive use (%)      | 13.1        | 7.2                   | 7.0         |
| Diabetes (%)                  | 4.1         | 1.2                   | 0.0         |
| Daily smokers (%)             | 27.3        | 33.3                  | 34.8        |
| Mean Body-mass index (SD)     | 26.5 (4.0)  | 26.1 (4.0)            | 25.8 (3.8)  |

SD: standard deviation.



Table 2. Albumin/Creatinine ratio by headache status and selection criterium

|                       | <b>Crude</b>                |                    | <b>Model I<sup>C</sup></b>  |                    | <b>Model II<sup>D</sup></b> |                    |
|-----------------------|-----------------------------|--------------------|-----------------------------|--------------------|-----------------------------|--------------------|
|                       | mean ACR<br>(95% CI)<br>N   | p-value            | mean ACR<br>(95% CI)<br>N   | p-value            | mean ACR<br>(95% CI)<br>N   | p-value            |
| <b>Morbid sample</b>  |                             | 0.013 <sup>A</sup> |                             | 0.13 <sup>A</sup>  |                             | 0.11 <sup>A</sup>  |
| No headache           | 2.03<br>(1.92-2.14)<br>3998 |                    | 1.96<br>(1.85-2.07)<br>3998 |                    | 1.96<br>(1.85-2.06)<br>3978 |                    |
| Non-migraine headache | 1.95<br>(1.68-2.23)<br>591  | 0.61 <sup>B</sup>  | 2.26<br>(1.97-2.54)<br>591  | 0.057 <sup>B</sup> | 2.27<br>(1.99-2.55)<br>585  | 0.044 <sup>B</sup> |
| Migraine              | 1.22<br>(0.68-1.75)<br>159  | 0.003 <sup>B</sup> | 1.85<br>(1.31-2.40)<br>159  | 0.70 <sup>B</sup>  | 1.87<br>(1.33-2.41)<br>158  | 0.75 <sup>B</sup>  |
| <b>Random sample</b>  |                             | 0.011 <sup>A</sup> |                             | 0.60 <sup>A</sup>  |                             | 0.55 <sup>A</sup>  |
| No headache           | 1.22<br>(1.11-1.32)<br>1289 |                    | 1.16<br>(1.06-1.27)<br>1289 |                    | 1.16<br>(1.05-1.26)<br>1285 |                    |
| Non-migraine headache | 0.96<br>(0.77-1.14)<br>418  | 0.017 <sup>B</sup> | 1.08<br>(0.89-1.26)<br>418  | 0.44 <sup>B</sup>  | 1.07<br>(0.89-1.26)<br>417  | 0.44 <sup>B</sup>  |
| Migraine              | 0.85<br>(0.53-1.16)<br>144  | 0.028 <sup>B</sup> | 1.02<br>(0.70-1.34)<br>144  | 0.41 <sup>B</sup>  | 1.00<br>(0.68-1.31)<br>143  | 0.35 <sup>B</sup>  |

<sup>A</sup>p-value for overall effect of headache groups.

<sup>B</sup>p-values are for comparison against no headache group within the same selection criterium.

<sup>C</sup>Model I: Adjusted for age and sex.

<sup>D</sup>Model II: Adjusted for age, sex, self-reported diabetes and self-reported use of antihypertensive medication.

Table 3: Albumin/Creatinine ratio by headache status in combined sample

|                          | <b>Crude</b>                |                     | <b>Model I<sup>C</sup></b>  |                   | <b>Model II<sup>D</sup></b> |                   |
|--------------------------|-----------------------------|---------------------|-----------------------------|-------------------|-----------------------------|-------------------|
|                          | mean ACR<br>(95% CI)<br>N   | p-value             | mean ACR<br>(95% CI)<br>N   | p-value           | mean ACR<br>(95% CI)<br>N   | p-value           |
|                          |                             | <0.001 <sup>A</sup> |                             | 0.29 <sup>A</sup> |                             | 0.23 <sup>A</sup> |
| No headache              | 1.83<br>(1.75-1.92)<br>5287 |                     | 1.73<br>(1.65-1.81)<br>5287 |                   | 1.73<br>(1.64-1.81)<br>5263 |                   |
| Non-migraine<br>headache | 1.54<br>(1.35-1.73)<br>1009 | 0.007 <sup>B</sup>  | 1.89<br>(1.69-2.09)<br>1009 | 0.15              | 1.90<br>(1.71-2.09)<br>1002 | 0.11 <sup>B</sup> |
| Migraine                 | 1.04<br>(0.69-1.39)<br>303  | <0.001 <sup>B</sup> | 1.67<br>(1.31-2.03)<br>303  | 0.74              | 1.66<br>(1.31-2.01)<br>301  | 0.72 <sup>B</sup> |

<sup>A</sup>p-value for overall effect of headache groups.

<sup>B</sup>p-values are for comparison against no headache group.

<sup>C</sup>Model I: Adjusted for age and sex.

<sup>D</sup>Model II: Adjusted for age, sex, self-reported diabetes and self-reported use of antihypertensive medication.

Table 4: Albumin/Creatinine ratio by migraine subtypes

|                       | <b>Crude</b>                |                     | <b>Model I<sup>C</sup></b>  |                   | <b>Model II<sup>D</sup></b> |                   |
|-----------------------|-----------------------------|---------------------|-----------------------------|-------------------|-----------------------------|-------------------|
|                       | mean ACR<br>(95% CI)<br>N   | p-value             | mean ACR<br>(95% CI)<br>N   | p-value           | mean ACR<br>(95% CI)<br>N   | p-value           |
|                       |                             | <0.001 <sup>A</sup> |                             | 0.78 <sup>A</sup> |                             | 0.68 <sup>A</sup> |
| No headache           | 1.83<br>(1.75-1.92)<br>5287 |                     | 1.73<br>(1.65-1.81)<br>5287 |                   | 1.73<br>(1.64-1.81)<br>5263 |                   |
| Migraine without aura | 1.05<br>(0.66-1.44)<br>244  | <0.001 <sup>B</sup> | 1.73<br>(1.33-2.122)<br>244 | 0.88 <sup>B</sup> | 1.73<br>(1.34-2.13)<br>242  | 0.85 <sup>B</sup> |
| Migraine with aura    | 1.00<br>(0.21-1.80)<br>59   | 0.042 <sup>B</sup>  | 1.43<br>(0.64-2.22)<br>59   | 0.49 <sup>B</sup> | 1.36<br>(0.59-2.13)<br>59   | 0.39 <sup>B</sup> |

<sup>A</sup>p-value for overall effect of headache groups.

<sup>B</sup>p-values are for comparison against controls.

<sup>C</sup>Model I: Adjusted for age and sex.

<sup>D</sup>Model II: Adjusted for age, sex, self-reported diabetes and self-reported use of antihypertensive medication.
